# Supplementary material for: ‘This isn't what mine looked like’: a qualitative study of symptom appraisal and help seeking in people recently diagnosed with melanoma
Source: PubMed Central journal article supplement (PMC4120305; doi:10.1136/bmjopen-2014-005566), 2014-07-21
Supplement: bmjopen-2014-005566.draft_revisions.pdf [file bmjopen-2014-005566.draft_revisions.pdf]

# BMJ Open

## 'This isn't what mine looked like': a qualitative study of symptom appraisal and help seeking in people recently diagnosed with melanoma

|                                 |                                                                                                                                                                                                                                                                                                                                                                                                                                                                                                                                                                                                                                                                                                                                                           |
|---------------------------------|-----------------------------------------------------------------------------------------------------------------------------------------------------------------------------------------------------------------------------------------------------------------------------------------------------------------------------------------------------------------------------------------------------------------------------------------------------------------------------------------------------------------------------------------------------------------------------------------------------------------------------------------------------------------------------------------------------------------------------------------------------------|
| Journal:                        | <i>BMJ Open</i>                                                                                                                                                                                                                                                                                                                                                                                                                                                                                                                                                                                                                                                                                                                                           |
| Manuscript ID:                  | bmjopen-2014-005566                                                                                                                                                                                                                                                                                                                                                                                                                                                                                                                                                                                                                                                                                                                                       |
| Article Type:                   | Research                                                                                                                                                                                                                                                                                                                                                                                                                                                                                                                                                                                                                                                                                                                                                  |
| Date Submitted by the Author:   | 26-Apr-2014                                                                                                                                                                                                                                                                                                                                                                                                                                                                                                                                                                                                                                                                                                                                               |
| Complete List of Authors:       | Walter, Fiona; University of Cambridge, Dept of Public Health and Primary Care<br>Birt, Linda; University of Cambridge, Public Health & Primary Care<br>Cavers, Debbie; University of Edinburgh, General Practice<br>Scott, Suzanne; Kings College London Dental Institute, Unit of Social & Behavioural Sciences<br>Emery, Jon; University of Melbourne, General Practice and Primary Care Academic Centre; University of Cambridge, Public Health & Primary Care<br>Burrows, Nigel; Addenbrooke's Hospital,<br>Kavanagh, Gina; Royal Infirmary of Edinburgh,<br>MacKie, Rona; University of Glasgow,<br>Weller, David; University of Edinburgh, General Practice<br>Campbell, Christine; University of Edinburgh, Centre for Population Health Sciences |
| <b>Primary Subject Heading</b>: | Oncology                                                                                                                                                                                                                                                                                                                                                                                                                                                                                                                                                                                                                                                                                                                                                  |
| Secondary Subject Heading:      | Dermatology, Diagnostics, General practice / Family practice, Qualitative research                                                                                                                                                                                                                                                                                                                                                                                                                                                                                                                                                                                                                                                                        |
| Keywords:                       | Dermatological tumours < DERMATOLOGY, PRIMARY CARE, QUALITATIVE RESEARCH                                                                                                                                                                                                                                                                                                                                                                                                                                                                                                                                                                                                                                                                                  |
|                                 |                                                                                                                                                                                                                                                                                                                                                                                                                                                                                                                                                                                                                                                                                                                                                           |

SCHOLARONE™  
Manuscripts

1  
2  
3  
4  
5  
6  
7  
8  
9 **'This isn't what mine looked like': a qualitative study of symptom**  
10 **appraisal and help seeking in people recently diagnosed with**  
11 **melanoma**  
12  
13

14  
15  
16 Fiona M Walter<sup>1,2</sup>, Linda Birt<sup>1</sup>, Debbie Cavers<sup>3</sup>, Suzanne Scott<sup>4</sup>, Jon Emery<sup>2,1</sup>, Nigel Burrows<sup>5</sup>,  
17 Gina Cavanagh<sup>6</sup>, Rona MacKie<sup>7</sup>, David Weller<sup>3</sup>, Christine Campbell<sup>3</sup>  
18  
19

20  
21  
22  
23  
24  
25 <sup>1</sup> The Primary Care Unit, University of Cambridge CB1 8RN, UK

26 <sup>2</sup> University of Melbourne, Australia

27  
28 <sup>3</sup> University of Edinburgh, UK

29  
30 <sup>4</sup> Unit of Social & Behavioural Sciences, Kings College London Dental Institute, UK

31  
32 <sup>5</sup> Cambridge University Hospitals NHS Trust, Cambridge, UK

33  
34 <sup>6</sup> Royal Infirmary of Edinburgh, NHS Lothian, UK

35  
36 <sup>7</sup> University of Glasgow, UK  
37  
38  
39  
40  
41  
42

43 Correspondence to: Fiona M Walter [fmw22@medschl.cam.ac.uk](mailto:fmw22@medschl.cam.ac.uk)  
44  
45  
46  
47  
48  
49  
50  
51  
52  
53  
54  
55  
56  
57  
58  
59  
60

**ABSTRACT****Objective**

To explore symptom appraisal and help-seeking decisions among patients recently diagnosed with melanomas, and to compare experiences of people with 'thinner' (<1mm) and 'thicker' (>2mm) melanomas, as thickness at diagnosis is an important prognostic feature.

**Design**

Qualitative interview study.

**Participants**

Adult patients within ten weeks of melanoma diagnosis.

**Setting**

Two UK dermatology clinics: Cambridge and Edinburgh.

**Results**

63 patients were interviewed (29-93 years, 31 women, 30 thicker melanomas (superficial spreading 10, nodular 10, others 10). All described their skin changes using rich lay vocabulary. Many included unassuming features such as 'just a little spot' as well as common features of changes in size, colour and shape. There appeared to be subtly different patterns of symptoms: descriptions of vertical growth, bleeding, oozing and itch were features of thicker melanomas irrespective of pathological type.

Appraisal was influenced by explanations such as normal life changes, prior beliefs, and whether skin changes matched known melanoma descriptions. Most decisions to seek help were triggered by common factors such as advice from family and friends; family experiences of melanoma or media coverage also prompted people with thinner melanomas. Eleven patients reported previous reassurance about their skin changes by a HCP, with little guidance on monitoring change or when it would be appropriate to re-consult.

**Conclusions**

Patients diagnosed with both thinner and thicker melanomas often did not recognise or interpret their skin changes as warning signs or prompts to seek timely medical attention. The findings provide guidance for melanoma awareness campaigns on more appropriate images, helpful descriptive language, and the need to stress the often apparently innocuous nature of potentially serious skin changes. The importance of appropriate advice, monitoring and safety-netting procedures by HCPs for people presenting with skin changes is also highlighted.

**STRENGTHS AND LIMITATIONS OF THIS STUDY**

- This study is the first exploration of symptom appraisal and help-seeking among people diagnosed with ‘thinner’ melanomas (T1, very good prognosis, 5 year disease-free prospects 95%), compared with those with ‘thicker’ melanomas (T3 and T4, less good prognosis, 5 year disease-free prospects <45%).
- The study did not identify clear discriminating features in the diagnostic pathway, or features of thinner versus thicker melanomas.
- The findings highlight a mismatch between the information people need when assessing their skin changes and the information and images currently available, thus providing opportunities to incorporate more appropriate descriptive language, images and information into targeted community awareness campaigns as well as by the NHS and charities via their websites and promotional materials.
- A small but important minority of participants did not have their developing melanomas recognised during their first primary care consultation, and were not provided with enough information about on-going assessment of further skin changes or when to return to their clinician. These ‘safety-netting’ opportunities could be improved by more systematic approaches by HCPs.
- Using semi-structured interviews close to diagnosis allowed in-depth exploration of the participants’ experiences and views, but the accounts are necessarily retrospective and subject to recall and framing bias.

## INTRODUCTION

Diagnosing melanoma earlier is high on the UK health policy agenda. Since its announcement in the 2007 Cancer Reform Strategy, the National Awareness and Early Diagnosis Initiative (NAEDI) has supported activities to promote the earlier diagnosis of cancer [1], and aims to 'save an additional 5,000 lives every year by 2014/15 and to narrow the inequalities gap at the same time' [2]. In December 2013 a Parliamentary Roundtable addressed 'Improving the early diagnosis of melanoma- how can we save more lives?', and a 'Be Clear on Cancer' symptom awareness campaign, led by Public Health England in partnership with NHS England and the Department of Health, starts a melanoma pilot this summer focusing on encouraging earlier detection of melanoma. Since 2011 'Be Clear on Cancer' symptom awareness campaigns have been undertaken for bowel, lung, kidney, bladder and breast cancer, and early evaluations show some promising but patchy results [3]. Melanoma is the next focus because it poses a significant yet largely avoidable public health threat; it is estimated that around 190 deaths from melanoma could be avoided each year if survival rates in England matched the best in Europe [4].

Worldwide melanoma incidence rates are increasing faster than any other solid tumour. In the UK the incidence has quadrupled since the 1970s [5]; similar incidence rises have been reported across Europe [6 7], the USA [8] and Australia [9]. In the UK there were more than 2,209 deaths and 12,800 new cases diagnosed in 2011, with a disproportionately high rate among people aged less than fifty years [10]. There is considerable UK regional variation in overall five year relative survival rates, with Scotland having the highest average rate of 89%, while Wales has the significantly lower rate of 74% [4]. The most important prognostic factor is the tumour thickness at diagnosis according to the Breslow scale (T classification) [11]. Patients with a primary melanoma  $\leq 1$ mm at diagnosis (T1) currently have 5 year disease-free prospects of over 95%, while for tumours  $\geq 4$ mm at diagnosis but with no detectable evidence of metastatic spread (T3, T4) this falls to  $<45\%$  [10]. Tumour thickness is also associated with rapid growth which occurs more frequently in elderly men [12].

Timely diagnosis can be influenced by the diagnostic skills of GPs. A recent analysis of the Cancer Patient Experiences Survey 2009 and the 2010 RCGP cancer audit data reported that more than 90% of people diagnosed with melanoma were seen by their GPs less than three times before diagnosis, compared with 60-80% for the majority of cancer types [13]. This suggests that most melanomas are recognised by GPs and appropriately referred to specialist care in England [14].

Timely diagnosis can also be influenced by people's symptom appraisal and help-seeking behaviour. Compared with other cancers, people with melanoma have among the longest time between first noticing a symptom and presenting to their GP [15 16], suggesting that the major opportunity to diagnose melanoma earlier is prompting earlier presentation to healthcare through signs and symptom awareness campaigns [17]. This requires an understanding of how people interpret changes in their moles or new lesions. We present findings from an in-depth interview study with UK patients recently diagnosed with 'thinner'

1  
2  
3 (T1) compared with 'thicker' primary melanomas (T3 and T4), which aimed to explore the  
4 processes and experiences of symptom detection and help-seeking decisions leading to  
5 melanoma diagnosis.  
6  
7  
8

## 9 10 **METHODS**

### 11 **Design and ethics**

12  
13 Semi-structured face to face in-depth interviews were conducted with adults diagnosed  
14 with invasive cutaneous melanoma within the previous ten weeks. Ethics approval was  
15 obtained from the Cambridgeshire 4 Research Ethics Committee (11/EE/0076).  
16  
17  
18

### 19 **Setting and recruitment**

20  
21 Potential participants were identified and recruited by the melanoma/skin cancer nurse  
22 specialists via the weekly multidisciplinary team meetings of dermatologists, plastic  
23 surgeons and oncologists at two regional hospitals: Cambridge University Hospitals NHS  
24 Foundation Trust in the East of England, and the Edinburgh Royal Infirmary, NHS Lothian,  
25 Scotland. These hospitals together serve a population of approximately 1.4 million, and the  
26 MDT meetings review more than 400 new cases of invasive cutaneous melanoma each year.  
27  
28

29  
30 All adults aged 18 and over newly diagnosed with a primary invasive cutaneous melanoma  
31 (staged as  $\leq 1$ mm (T1, 'thinner') or  $\geq 2$ mm (T3 and T4, 'thicker') at the two participating  
32 hospitals were eligible for inclusion unless the melanoma/skin cancer nurse specialists felt  
33 that they were not suitable on clinical grounds (other severe physical or mental health  
34 conditions). Patients were mailed an invitation letter with a patient information sheet. As  
35 T3 and T4 melanomas are diagnosed at about 25% of the rate of T1 melanomas, we  
36 recruited all those with thicker melanomas who agreed to take part. At the same time we  
37 purposively sampled people with T1 melanomas by age, gender, location and season to  
38 ensure that we had a broad range of views and experiences, and we continued until  
39 saturation of data.  
40  
41  
42  
43  
44  
45

### 46 **Data collection**

47  
48 Interviews were undertaken between January 2012 and January 2013. In each area an  
49 experienced researcher used a semi-structured approach, with an interview schedule  
50 informed from the literature [18 19], our collective expertise from interviewing patients  
51 recently diagnosed with other cancers [20], and a pilot study (n=17). The theoretical  
52 approach of the Model of Pathways to Treatment [21 22] (Figure 1) was used to underpin  
53 the interview schedule, exploring the processes that occurred within each time-interval and  
54 focusing on: how initial symptoms were noticed; personal risk perceptions; the language  
55 used to describe symptoms and changes over time; the participant's decision-making and  
56  
57  
58  
59  
60

1  
2  
3 triggers to help-seeking; and the experience of the diagnostic process of primary and  
4 secondary care from the patient perspective. A calendar-landmarking technique [23] was  
5 used as an adjunct to the interviews, to establish the timing and details of events which led  
6 to the melanoma diagnosis, together with diaries and letters that participants referred to  
7 during this process. Participants were also invited make a pencil drawing/s of their skin  
8 cancer as it developed; on-going analyses are examining perceptions of lesions over time,  
9 and comparing the drawings with clinical images [24]. At the end of each interview,  
10 participants completed a short questionnaire to provide demographic data, and information  
11 about their skin and hair colour and their skin's response to UV light using the widely  
12 validated Fitzpatrick Scale [25].  
13  
14  
15  
16

17 Interviews were undertaken as soon as possible after diagnosis, with all interviews  
18 completed within 10 weeks of diagnosis, and the majority within 6 weeks. Interviews lasted  
19 between 40-65 minutes and were conducted primarily in the participant's home although  
20 two people chose to be interviewed in university offices. Patients were sometimes  
21 accompanied by a family member, usually spouse or daughter. Audio-recordings of  
22 interviews were professionally transcribed verbatim and anonymised.  
23  
24  
25  
26

## 27 Analysis

28 All interview transcripts were repeatedly read and re-read by the two researchers LB  
29 (nursing background) and DC (health services researcher), and the members of the 'core'  
30 analysis team also read the majority of the transcripts (FW, academic GP; SS, health  
31 psychologist; CC, primary care researcher). Analysis was an iterative process starting near  
32 the beginning of data collection and using the 17 pilot interviews to develop our analytic  
33 strategy. We used the approach of Framework analysis to create and establish meaningful  
34 patterns in five phases, namely: familiarization with the data, generating initial codes,  
35 inductively searching for themes among codes, index charting and mapping of data, before  
36 finally defining and naming themes [26]. The coding and data management were supported  
37 by NVivo software (QSR International, version 9). The Model of Pathways to Treatment  
38 (Figure 1) was also used to underpin the analysis with a theoretic model for the different  
39 intervals and processes that occur along the pathway to diagnosis and treatment, in order  
40 to accurately assess the time intervals, their content and context. The final themes were  
41 agreed through a series of meetings involving all five 'core' researchers, and a consensus  
42 meeting with the wider study team.  
43  
44  
45  
46  
47  
48

49 The analysis focused on the main themes within the time to presentation (TTP), defined as  
50 from the first detection of skin change to the first consultation with a healthcare  
51 professional [27 28]. This interval comprises the appraisal and help-seeking intervals [21],  
52 and the analysis examined patient and healthcare factors as well as 'disease' factors,  
53 relating to the developing melanoma. When the first consultation did not result in a  
54 referral, we also included further iterative processes until the next consultation in the  
55 analyses. Participants with shorter intervals tended to use diaries and have good recall of  
56  
57  
58  
59  
60

1  
2  
3 the relevant dates. People with longer intervals tended to have vaguer recollections,  
4 particularly around the time they had first detected any skin change. While participants  
5 were often able to discuss triggers to help-seeking, they were less able to recall the precise  
6 dates of these triggers, and we therefore do not present the separate durations of the  
7 appraisal and help-seeking intervals.  
8  
9

10 We went on to examine our themes by comparing narratives from participants diagnosed  
11 with thinner and thicker melanomas, and by the melanoma types within these groups. We  
12 further validated our themes by examining the whole dataset stratified by gender, by age  
13 (less than 60 vs 60 and over, and 80 and over), by educational level (no further education vs  
14 further education), and by geographical location (Cambridge vs Edinburgh). Credibility was  
15 increased by the two researchers together undertaking coding and producing code tables  
16 throughout the analytic process, and reaching consensus from the potentially wide range of  
17 interpretations across the 'core' analysis team.  
18  
19  
20  
21  
22  
23

## 24 **RESULTS**

25  
26 A total of 241 adult patients were approached to take part in this study (Cambridge 114,  
27 Edinburgh 127), 121 were willing to participate (50%: Cambridge 53%, Edinburgh 47%), and  
28 63 were interviewed.  
29  
30  
31  
32

### 33 **Patient characteristics**

34  
35 Table 1 shows the demographic and self-reported skin characteristics of the 63 study  
36 participants, and the clinical characteristics of their melanomas, comparing participants with  
37 thinner (n=33) and thicker (n=30) melanomas. The thinner melanomas were all  
38 histologically reported as superficial spreading melanomas (SSM) and lentigo maligna  
39 melanomas (LMM) apart from one diagnosed as part SSM and part NM ('other'). Due to our  
40 sampling strategy there was a higher prevalence of nodular melanomas than in reported  
41 local figures. However, only a third of the thicker melanomas were nodular melanomas  
42 (NM, n=10), while a third were SSM (n=10), and the remaining third had 'other' diagnoses  
43 (LMM 2, acral 1, malignant blue naevus 1, unclassified 6). Of the nine participants diagnosed  
44 with melanoma on their back, seven were male, and three had thicker melanomas (NM 2,  
45 SSM 1).  
46  
47  
48  
49

50 The mean age of the whole group was 63.7 years (range 29-93 years); the mean age of  
51 those with thinner melanomas was 60.5 years, and of those with thicker melanomas was  
52 66.1 years. 58% of melanomas in men and 42% in women were thicker. The groups were  
53 otherwise similar for socio-demographic factors: most were white British with one white  
54 non-British, almost half were retired (30, 48%), and only a third had undergone higher  
55 education. One quarter of the group reported a family history of melanoma, while eight  
56  
57  
58  
59  
60



1  
2  
3 participants reported previous skin cancer (melanoma 2, basal cell carcinoma (BCC) 6): we  
4 were only able to verify the two melanomas with histology reports.  
5  
6  
7

### 8 **Duration of skin changes**

9  
10 Four participants (male 3, female 1) had their melanomas diagnosed opportunistically by a  
11 HCP (3 GPs, 1 oncologist); all these were thinner melanomas. The time to presentation (TTP)  
12 was between 1 week and 303 weeks (thinner: median TTP 21 weeks, range 1-303 weeks;  
13 thicker: median TTP 19 weeks, range 1-156 weeks). Most participants who presented with  
14 skin changes were referred after their first primary care consultation. The remainder were  
15 referred after their second consultation (n=11); none reported more than two consultations  
16 prior to referral. Comparisons between those with thinner (n=4) and thicker (n=7)  
17 melanomas who were referred after a second primary care consultation are presented in  
18 Table 5 and discussed later (see section on Healthcare providers and system factors).  
19  
20  
21  
22

23 The main emerging themes within the appraisal and help-seeking intervals are discussed  
24 below. Throughout this section quotations are accompanied by information about gender  
25 (M, F), age, melanoma group (thinner or thicker), type of melanoma (SSM, NM, LMM,  
26 other), and symptom duration as time to presentation in weeks (including first and second  
27 presentations).  
28  
29  
30  
31

### 32 **The appraisal interval**

33  
34 The 59 participants who detected their melanoma themselves described a variable and  
35 complex process of appraisal and re-appraisal of their skin, against their background  
36 knowledge of 'normal skin changes' and potential risk factors. We found no evidence of  
37 differences between people with thinner and thicker melanomas across any of these  
38 themes.  
39  
40  
41  
42

### 43 **Patient factors**

#### 44 ***Explanations for skin changes***

45  
46 Awareness of a skin change, either a new lesion or a change in an existing lesion, did not  
47 usually cause any initial concern as it seemed so innocuous, and was often attributed to  
48 normal life changes such as pregnancy or aging.  
49  
50

51 *'I didn't recognise it as something that was different, because I've got quite a few moles on*  
52 *my skin so therefore I thought, "Has this been here before, or am I just imagining that I*  
53 *haven't seen it before?"' [F, 68, thinner, SSM, 52w]*

54  
55 *'Perhaps because I'd been pregnant and everything was darker anyway or you know, I didn't*  
56 *take any notice.'* [F, 36, thicker, NM, 17w]  
57  
58  
59  
60

1  
2  
3 Other explanations were also often made, such as an insect bite or injury when the  
4 participant had been outside or in the garden.

5  
6 *'Since I'd been outside to a barbeque and I thought, oh well I've been bitten, it's just bitten*  
7 *there on the mole.'* [F, 54, thicker, SSM, 1w]  
8

9 Skin changes were sometimes attributed to another skin condition (such as psoriasis) if it  
10 presented in a similar way; in these cases participants' previous experiences of a benign  
11 condition could influence their perception of the potential seriousness of the new skin  
12 changes.  
13

### 14 15 16 17 **Prior beliefs about melanoma and its risk factors**

18 Skin changes were appraised within the context of peoples' prior beliefs about melanoma  
19 and its risk factors, and their life experiences. Participants often used the terms skin cancer  
20 and melanoma interchangeably, and their prior awareness of melanoma varied widely.  
21 Whereas some participants noted that they had no awareness at all, others described  
22 gaining some knowledge about melanoma via TV programmes, magazines, the internet, and  
23 occasionally, health promotion material. A minority had heightened awareness through the  
24 melanoma experience of a family member or friend, or even a celebrity. A family history of  
25 melanoma or a personal previous melanoma led several people to have heightened risk  
26 perception and awareness and to quickly identify skin changes as a potential melanoma; all  
27 these people sought help rapidly and presented with thinner melanomas:  
28

29  
30  
31  
32 *'I wouldn't have known what they were talking about'* [M, 62, thicker, SSM, 52w]

33  
34 *'...because my mum has had a melanoma ten years ago so I've always been aware to keep a*  
35 *check on my moles.'* [F, 29, thinner, SSM, 3w]  
36

37 Many participants showed some understanding of the risk factors associated with  
38 melanoma and/or skin cancer when they discussed having lived in hot climates, or having  
39 suffered from sunburn, especially as a child. However, some were quite certain that they  
40 had never exposed themselves to the risk of UV damage:  
41

42  
43 *'I thought I had been careful about sitting out in the sun.'* [F, 57, thicker, NM, 36w]  
44

45 Prior knowledge or experience of melanoma and its risk factors did not appear to be related  
46 to educational levels, nor to melanoma thickness at diagnosis.  
47

### 48 49 50 **Do skin changes 'match' a melanoma?**

51 While some participants admitted to prior knowledge of the symptoms and signs of a  
52 melanoma, such as 'jagged edges' or change in colour, only a few people had known that an  
53 itchy or bleeding mole was a 'bad' sign. Only two people noticed a match between their  
54 observed skin changes and their mental image of a melanoma, and this match appeared to  
55 prompt appropriate help-seeking, leading to shorter times to presentation.  
56  
57  
58  
59  
60

1  
2  
3 *'I don't know when I learnt it, but it was just in my subconscious that "ooh I need to go and,*  
4 *it's an itchy mole, that's not good".'* [M, 45, thicker, SSM, 4w/52w]

5 Strikingly, the majority of participants reported that their observed skin changes did not  
6 match their mental image (which had arisen from the melanoma experience of a family  
7 member or friend, from written and visual images, or from their knowledge of other  
8 cancers, see Table 2). When the changes did not match their mental images, people  
9 appeared more likely to 'normalise' their skin changes, or adopt other explanations, thus  
10 delaying help-seeking and diagnosis. Thus, the appraisal interval was often prolonged when  
11 there was a 'mismatch' between the mental image people had of melanoma and the way in  
12 which their own skin changes developed.  
13  
14  
15  
16

### 17 18 19 **Disease factors: skin changes**

20 Most participants used rich and vivid lay vocabularies to describe their skin changes, for  
21 example, *'like a black fly squashed on a mirror'* [M, 48, thinner, SSM, 2w]. Table 3 shows  
22 descriptions of skin changes noticed by participants, displayed according to the items of the  
23 Glasgow seven-point checklist (7PCL) [29]. It also gives descriptions not commonly found on  
24 checklists. For instance, many people reported surprise at the small size of their melanoma,  
25 describing it as 'just a little spot'. Some also reported a 'spot on a mole', or that their skin  
26 change had been 'always there' or a 'new lesion'; a few reported their lesion as 'different to  
27 the others' (resonating with the Ugly Duckling sign [30]).  
28  
29  
30  
31

32 Overall, Table 3 shows that both thinner and thicker melanomas can show any of the  
33 changes described in the 7PCL. However there is a suggestion of slightly different patterns.  
34 In particular, patients with thicker melanomas, both NMs and SSMs, described the so-called  
35 'minor features' of bleeding, oozing and itch more often. They also described both  
36 horizontal and vertical growth, again, irrespective of pathological type. Patients with  
37 thinner lesions discussed changes in shape more often. We were not able to find any  
38 differences in descriptions of skin changes between gender, age, educational level or  
39 geographical region.  
40  
41  
42  
43  
44

### 45 46 **The help-seeking interval**

47 Reasons for waiting before seeking help included weighing up the priority of their skin  
48 change against other commitments. Many participants had been encouraged by other  
49 people to seek the advice of a HCP for their skin change. Emotions such as fear of a serious  
50 condition, cancer or treatment, were seldom mentioned and seemed to play little part in  
51 most peoples' decision-making, either to promote or delay help-seeking. More were  
52 concerned about going to see their GP with only minor symptoms, and wasting the GP's  
53 time.  
54  
55  
56  
57  
58  
59  
60

## Patient factors

### Prioritisation choices

Many participants discussed other responsibilities in their lives which felt more important than making an appointment to consult their GP about a skin change, and therefore contributed to delays in help-seeking. These competing priorities included employment, care of family members, moving house, holidays, and other health concerns.

*'In the cab game you can't organise things, you can't afford to be off your work' [M, 66, thicker, other, 156w]*

*'The six year old has got ADHD and mild autism and he's hard work, and I suppose [you're] concentrating on him most of your life like, and don't think about yourself...' [M, 36, thicker, NM, 78w/3w]*

*'I'd been very busy with selling a house, buying a house, all the rest of it, and of course I've patients as well to see' [F, 72, thinner, SSM, 8w]*

*'I had an ulcer on my leg, and redressing that, so I think I was more taken up with that getting healed...' [F, 76, thicker, NM, 4w (Community nurse contacted GP)]*

Some people mentioned repeatedly failing to make an appointment with a HCP either because of the competing responsibilities or because a skin change was 'not a priority':

*'I was supposed to have phoned up, but I forgot because it was busy at work and... it just skipped my memory' [M, 59, thinner, SSM, 1w]*

*'I didn't class it as an emergency...I didn't think it was important enough...' [M, 64, thicker, other, 20w]*

We found no differences in prioritisation choices between people with thinner and thicker melanomas.

### Influence of other family members and the social network

Many participants had been encouraged by other people to seek medical help, either by an observation about the skin change itself, or an encouragement to make an appointment with their GP, see Table 4. Some participants had not been aware of their skin change until it was noticed by another person; others had known, and were also often aware that it was continuing to change, but they were ultimately encouraged to seek help by others. The other people included family members, friends, work colleagues, and people providing treatments such as beauty therapists and hairdressers. The promotion of help-seeking, whether by family members or friends, did not appear to affect time to presentation overall, but may have acted as a trigger for many people. A few people were wrongly reassured by family members or friends that their skin change was not potentially serious. This appeared to delay timely help-seeking. There was no evident difference in the influence of family members between people diagnosed with thinner or thicker melanomas.

### Triggers for help-seeking

The main difference between participants with thinner and thicker melanomas was apparent with the 'triggers' that people described as they moved from the appraisal to help-seeking interval, when they realised that they 'had a reason to discuss their skin change with a HCP' - see Figure 1. While most people from both groups consulted family or their wider social network for endorsement to seek help about aspects of skin changes (changing colour, texture and size), some people with thinner melanomas also reported a heightened awareness of cancer from family experiences or the non-medical media, or noticing their skin changes as 'different to normal', while participants with thicker melanomas appeared to depend on prompts such as the more 'red flag' symptom of oozing/bleeding:

*'It was a black mole and most of my moles are dark or light brown so it was a different colour' [F, 29, thinner, SSM, 3w]*

*'I'd seen something on that Embarrassing Bodies programme, and they did a thing about moles and what was not right and so I suppose I saw that and that sort of made me think, maybe I should go and get it looked at.'* [F, 54, thicker, SSM, 1w]

*'It started to bleed, that was the point at which I went to the doctor 'cos I thought it shouldn't be bleeding' [F, 64, thicker, LMM, 104w]*

### Healthcare providers and system factors

Issues concerning healthcare providers and the NHS were only mentioned by a minority of participants. The first and most important area of concern involved a group of participants (n=11; thinner=4 (SSM 3, LMM 1); thicker=7 (SSM 2, NM 3, acral 1, blue malignant naevus 1) who reported that they had previously shown their lesion to a HCP, and had been reassured that they did not need further treatment, see Table 5. While some just made a passing reference to their first, reassuring encounter with their GP, others gave far more detailed descriptions. A first encounter often appeared to delay a second visit to the GP by providing 'false reassurance' about the lesion. Some mentioned that they had not been given advice (oral, written or a website) on how to best monitor their lesion and what changes should alert them to returning to their GP; this could potentially result in thicker lesions at diagnosis.

*'When people have told you that it's okay... I sort of took me eye off the ball really because I thought, well, they know better than I do.'* [M, 75, thicker, SSM, 1w/17 w]

Some people had problems with accessing their general practice for an appointment, and, for a few busy people, this problem was exacerbated by having competing priorities.

*'Trying to get an appointment with the GP here can just be horrific and because I'm out on the road.. I have to plan these things a couple of weeks ahead.'* [F, 40, thinner, SSM, 3w]

A few people with thicker melanomas also mentioned a dislike of seeing doctors, either in general practices or hospitals, so this might have delayed help-seeking.

1  
2  
3 *'I'm just not a hospital person or a doctor person. If I'm really ill, I ken I'll have to go, but I*  
4 *have to be that way.'* [M, 52, thicker, SSM, 42w]

5  
6 Patients' concerns about 'wasting their GP's time' are well known, but this concern  
7 appeared to be exacerbated by the small size of the skin changes, and the lack of pain or  
8 other features which could signify more serious conditions. Again, this concern appeared  
9 more prevalent among people with thicker than thinner melanomas.

10  
11 *'My decisions on going to the GP are always influenced to some extent by a knowledge of*  
12 *how busy they are and not wanting to waste their time.'* [F, 48, thicker, other, 4w/78w]

13  
14 *'I think most people that I know would be afraid of the doctor saying to himself or herself,*  
15 *you know, there's people just coming for nothing at all.'* [M, 93, thicker, LMM, 22w]

16  
17  
18 A 56 year old woman diagnosed with a stage IIIA nodular melanoma on her lower leg  
19 described her pathway over six months as follows:

20  
21 Appraisal (10w): *'I've always had a mole on my leg.. it was there from birth.. it never*  
22 *bothered me because it was just flat and dark brown... It was possibly about six months ago I*  
23 *noticed it was just a little bit raised when it had always been flat.. as if like maybe something*  
24 *was stuck in there..'*

25  
26 Help-seeking: *'I was due to have a smear and.. I asked the nurse to look at it.. and she said,*  
27 *"Oh no, there's nothing to worry about, that's... I can tell these things," so she just sort of put*  
28 *my mind at rest... I thought, "Well, she knows what she's talking about."*

29  
30 Re-appraisal- 16 weeks: *'It just started obviously getting bigger and bigger. What was the*  
31 *worst was every time I knocked it, it bled.. like a tick on you, because it was big and bulbous.'*

32  
33 Help-seeking: *'I realised it was getting bigger and my friend and I had talked about it and [I*  
34 *returned to the surgery] .. it was a different nurse more senior, I have known her for years..*  
35 *she sort of panicked me ..saying.. I need to get that looked at straight away.'*  
36  
37  
38  
39  
40  
41

## 42 DISCUSSION

### 43 Main findings

44 This is the first study of detailed patient descriptions of their symptom experience and  
45 pathways to diagnosis of thinner and thicker melanomas in the UK. Addressing the policy  
46 agenda to diagnose melanoma earlier, the findings provide a number of novel insights  
47 where future interventions may be targeted. The key finding is that there appear to be  
48 subtly different patterns of symptoms experienced by those with thicker and thinner  
49 melanomas. In particular, descriptions of vertical growth, bleeding, oozing and itch were  
50 features of thicker melanomas irrespective of pathological type. Furthermore, they did not  
51 appear to occur subsequent to changes in size, shape and colour, nor just be due to location  
52 on the body, for example, not all thicker lesions were nodular melanomas on the backs of  
53 older men. There was no clear distinction between time to presentation and melanoma  
54  
55  
56  
57  
58  
59  
60

1  
2  
3 thickness. It also does not appear that those with thicker melanomas have different  
4 cognitive, emotional or behavioural responses to skin changes compared to those with  
5 thinner melanomas, or have different pathways to or through the healthcare system. Whilst  
6 help-seeking was often postponed because of other life concerns, most decisions to seek  
7 help were triggered by common factors such as advice from family and friends, although  
8 family experiences of melanoma or media coverage could prompt people with thinner  
9 melanomas.  
10

11  
12  
13 We also found a mismatch between the textual information and published images currently  
14 available, and the skin changes that were noticed. This provides opportunities to  
15 incorporate more appropriate lay vocabulary and photographic images into targeted  
16 community NHS and charity-run awareness campaigns such as 'Be Clear on Cancer' and  
17 'Detect Cancer Early'. A small but important minority of participants did not have their  
18 developing melanomas recognised during their first primary care consultation, and were not  
19 provided with enough information about on-going assessment of further skin changes or  
20 when to return to their clinician. These 'safety-netting' opportunities could be improved by  
21 more systematic approaches by GPs.  
22  
23  
24  
25  
26  
27

### 28 **Strengths and weaknesses**

29  
30 Our methodological approaches have a number of strengths. We do not know of any other  
31 studies worldwide which have compared the patient experience across the appraisal and  
32 help-seeking intervals between people with thinner and thicker melanomas. We recruited  
33 participants systematically from dermatology clinics in two contrasting regions over 12  
34 months, and interviewed all the consenting patients diagnosed with the much less common  
35 melanomas  $\geq 2\text{mm}$  thickness with a poorer prognosis. The thicker melanoma group included  
36 equal numbers of NMs, SSMs, and other rare and unclassified types although no amelanotic  
37 lesions; the diversity of types in this group suggest that the differences identified between  
38 the thinner and thicker groups cannot simply be considered due to the biological differences  
39 between SSMs and NMs.  
40  
41  
42

43  
44 Furthermore, using semi-structured interviews soon after diagnosis reduced recall bias, and  
45 allowed participants to speak freely about the period leading up to their diagnosis.  
46 Calendar-landmarking was of value to a large minority of participants, who were able to  
47 refine their recall of events and time intervals along their time to presentation [30]. Asking  
48 people to draw their skin changes and developing melanomas was also of value to a number  
49 of participants, allowing them to describe subtle changes in more detail, and also to  
50 corroborate the accuracy of their recall of timing and events. Data saturation was reached  
51 before the total sample had been interviewed, suggesting that our findings are robust and  
52 representative of people diagnosed with melanoma in these regions of England and  
53 Scotland. As recommended in a 2006 review of symptom interpretation as a source of delay  
54 in melanoma presentation [31], we increased the rigour of our research by applying a  
55  
56  
57  
58  
59  
60

1  
2  
3 theoretical approach (the Pathways to Treatment model, [21 22]) to frame our data  
4 collection and analysis. We conducted and reported this study according to the Aarhus  
5 statement guidelines on early cancer diagnosis research [27].  
6

7  
8 The main weakness is that the interviews are necessarily retrospective and subject to recall  
9 and framing bias. As a result, the accounts cannot be regarded as an exact description of  
10 what happened. Instead, they are narratives that allowed people to describe their  
11 experiences and reflect a post-hoc rationalisation of events framed by their subsequent  
12 encounters with HCPs and increased knowledge since the diagnosis. Furthermore, people  
13 from these two UK regions may have different beliefs and experiences of the pathway to  
14 melanoma diagnosis from people in other UK regions, or from patients who did not agree to  
15 take part in the study.  
16  
17  
18  
19

### 20 21 **Comparison with existing literature**

22 While there is a paucity of qualitative studies undertaken with people soon after their  
23 melanoma diagnosis, our findings resonate with a grounded theory study undertaken in  
24 northern England, and exploring the meaning to people treated for melanoma of shorter  
25 and longer time-lapses between detecting signs and receiving treatment [32], and those  
26 from an interview study about factors influencing presentation in primary care, undertaken  
27 with patients with suspicious pigmented lesions (only 4/40 interviewees were later  
28 diagnosed with melanoma) [19]. A French questionnaire study set among 590 people with  
29 melanomas also showed that relatives were involved in the detection of half of the  
30 melanomas, with median delays of 4 months before the patient realized they had a  
31 suspicious lesion, and further median delays of 2 months before this lesion was seen by a  
32 doctor [33]. Other evidence around time to diagnosis, but not comparing thinner and  
33 thicker melanomas, comes mainly from retrospective review of medical records or  
34 dermatologist experience, and suggests similar times to presentation and diagnosis [34].  
35  
36  
37  
38  
39  
40  
41  
42

### 43 **Implications for clinicians and policymakers**

44 Policymakers continue to face the challenge of a widespread lack of awareness of cancer  
45 symptoms among the UK general population [35], and that there are significant barriers to  
46 help-seeking [36]. Policy responses have included campaigns to raise symptom awareness,  
47 with major investment in the new 'Be Clear on Cancer' melanoma campaign. Our findings  
48 clearly demonstrate that the words and images in current use may not meet the needs of  
49 the population who are likely to be assessing their skin changes at an early stage in tumour  
50 development. Current images tend to represent more extreme changes which may not  
51 always be present. Future melanoma awareness campaigns, as well as NHS and charity  
52 websites giving information about skin checks, would be advised to provide more evidence  
53 around the features of early skin changes using lay vocabulary [37], to consider their  
54 selection of images of early melanomas for a better 'match' with people's observations, and  
55  
56  
57  
58  
59  
60



1  
2  
3 to provide more evidence around prompts to encourage timely help-seeking. They should  
4 also consider more targeted approaches such as focusing on: higher risk groups such as  
5 older men, with tailored information, lay vocabulary and images; families and friends with  
6 advice on how to check each other's skin regularly; and professional groups from the hair,  
7 beauty, and exercise industries who also undertake informal skin checks.  
8  
9

10 Several participants reported visiting their GP or other HCP on more than one occasion and  
11 some were given false reassurance. The average GP working in the UK will only diagnose a  
12 melanoma every 2-3 years but will commonly be consulted about a pigmented skin lesion,  
13 often after other health issues have already been discussed in the consultation. While we  
14 recognise the challenges facing GPs when differentiating potentially rare and serious  
15 conditions such as melanoma from common and benign conditions, this study suggests that  
16 some patients are not being provided with adequate information either about monitoring  
17 their skin changes or what changes should prompt another consultation; this may lead to  
18 longer time to diagnosis, and even diagnosis at a later stage with a poorer prognosis. The  
19 principles of 'safety-netting' have been disseminated by the RCGP and could be applied  
20 more effectively; they include recommendations for appropriate advice and written  
21 information for patients about the warning symptoms, monitoring symptoms, when to  
22 make a follow-up appointment, and reassurance to patients that symptoms like skin  
23 changes warrant GP attention, thus 'legitimising' a follow-up visit [38].  
24  
25  
26  
27  
28  
29  
30  
31

### 32 **Unanswered questions and future research**

33 While the findings of this qualitative study are of immediate importance to primary care  
34 clinicians and policymakers, there are also suggestions of subtly different patterns of  
35 symptoms experienced by those with thicker and thinner melanomas, irrespective of  
36 pathological type. The descriptions of vertical as well as horizontal growth, and bleeding,  
37 oozing or itch were particular features of thicker melanomas but not only NMs.  
38 Furthermore, they did not appear to occur subsequent to changes in size, shape or colour so  
39 may not necessarily be later features of melanoma. Although these symptom clusters may  
40 be more related to tumour biology than differences in symptom appraisal and help-seeking,  
41 these interesting differences need further exploration with bigger and more diverse  
42 populations and quantitative as well as qualitative study designs.  
43  
44  
45  
46

47 Alternative approaches to raising symptom awareness and supporting monitoring of skin  
48 changes to prompt earlier help seeking may be needed. There is a growing interest in the  
49 application of smartphone technology as one such approach but concerns remain around  
50 their safety and utility, and is clearly an area for further research [39].  
51  
52  
53  
54  
55  
56  
57  
58  
59  
60

## ACKNOWLEDGEMENTS

We particularly thank all the patients who kindly gave up their time and shared their personal accounts with us. We also thank Vicky McMorrnan and Sheena Dryden, melanoma/skin cancer nurse specialists at Cambridge University Hospitals NHS Foundation Trust and the Edinburgh Royal Infirmary NHS Lothian respectively, for their enthusiastic help with recruitment. We are also grateful to our two patients who gave us insights and feedback throughout the study, to Anna Barford for her early contribution to study set-up and data collection, to James Brimicombe for advice on data management and for developing the research database, and to Mr Per Hall for his support and encouragement throughout the study and comments on the final manuscript.

## Contributors

This study arose from collaboration between members of the National Cancer Research Institute (NCRI) Primary Care and Melanoma Clinical Studies Groups. FW, CC, RM, SS and DW were involved in the design of the study. JE and RM provided primary care cancer research and melanoma expertise respectively. NB and GK led recruitment at the two sites. LB and DC performed all the interviews and led the analysis, contributing to the core study team together with FW, SS and CC. FW wrote the first draft of the manuscript; all authors reviewed and edited the manuscript.

## Funding

Thanks to our funding organisation the National Awareness and Early Diagnosis Initiative (NAEDI), and to their funding partners: Cancer Research UK; Department of Health, England; Economic and Social Research Council; Health and Social Care Research and Development Division; Public Health Agency, Northern Ireland, National Institute for Social Care and Health Research, Wales and the Scottish Government. All researchers were independent of the funding body and the study sponsors and funder had no role in study design; data collection, analysis and interpretation of data; in the writing of the report; or decision to submit the article for publication.

FW was supported by an NIHR Clinical Lectureship followed by a NIHR Clinician Scientist award at the time of this study. The views expressed in this publication are those of the author(s) and not necessarily those of the NHS, the National Institute for Health Research or the Department of Health.

## Ethics and governance approvals

The study obtained ethical approval from the Cambridgeshire 4 Research Ethics Committee (11/EE/0076). Patients gave informed written consent for participation. The study was CKCRN approved (ID number 10310), and obtained NHS governance approvals from Cambridge University Hospitals NHS Foundation Trust's Research & Development Department, and NHS Lothian (Lothian R&D Project No: 2011/R/DER/04).

**Data sharing**

No additional data available

**Competing Interests**

All authors have completed the Unified Competing Interest form at [www.icmje.org/coi\\_disclosure.pdf](http://www.icmje.org/coi_disclosure.pdf) (available on request from the corresponding author) and declare that (1) they have no support from or relationships with companies that might have an interest in the submitted work in the previous 3 years; (2) their spouses, partners, or children have no financial relationships that may be relevant to the submitted work; and (3) they have no non-financial interests that may be relevant to the submitted work.

The corresponding author has the right to grant on behalf of all authors and does grant on behalf of all authors, an exclusive licence on a worldwide basis to the BMJ Publishing Group Ltd and its Licensees to permit this article (if accepted) to be published in BMJ editions and any other BMJ PGL products and sublicences to exploit all subsidiary rights, as set out in our licence (<http://resources.bmj.com/bmj/authors/checklists-forms/licence-for-publication>).

All authors had full access to all of the data in the study and can take responsibility for the integrity of the data and the accuracy of the data analysis

The corresponding author affirms that the manuscript is an honest, accurate, and transparent account of the study being reported; that no important aspects of the study have been omitted; and that any discrepancies from the study as planned (and, if relevant, registered) have been explained.

## REFERENCES

1. Cancer Research UK. The National Awareness and Early Diagnosis Initiative.  
<http://www.cancerresearchuk.org/cancer-info/spotcancerearly/naedi/AboutNAEDI/> (last accessed 21 April 2014).
2. Department of Health. Improving Outcomes: a strategy for cancer. 2011.  
[http://www.dh.gov.uk/en/Publicationsandstatistics/Publications/PublicationsPolicyAndGuidance/DH\\_123371](http://www.dh.gov.uk/en/Publicationsandstatistics/Publications/PublicationsPolicyAndGuidance/DH_123371) (last accessed 21 April 2014).
3. Cancer research UK. About Be Clear on Cancer 2013. Available from:  
<http://www.cancerresearchuk.org/cancerinfo/spotcancerearly/naedi/BeClearonCancer/background> (last accessed 21 April 2014).
4. Abdel-Rahman M, Stockton D, Rachet B, et al. What if cancer survival in Britain were the same as in Europe: how many deaths are avoidable? *Br J Cancer* 2009;**101 Suppl 2**:S115-24 doi: 10.1038/sj.bjc.6605401.
5. Farasat S, Yu SS, Neel VA, et al. A new American Joint Committee on Cancer staging system for cutaneous squamous cell carcinoma: creation and rationale for inclusion of tumor (T) characteristics. *J Am Acad Dermatol* 2011;**64**(6):1051-9 doi: 10.1016/j.jaad.2010.08.033.
6. de Vries E, Coebergh JW. Cutaneous malignant melanoma in Europe. *Eur J Cancer* 2004;**40**(16): 2355-66.
7. Berrino F, De Angelis R, Sant M, et al. Survival for eight major cancers and all cancers combined for European adults diagnosed in 1995-99: results of the EURO CARE-4 study. *Lancet Oncol* 2007;**8**(9):773-83.
8. Jemal A, Devesa SS, Hartge P, et al. Recent trends in cutaneous melanoma incidence among whites in the United States. *J Natl Cancer Inst* 2001;**93**(9):678-83.
9. Garbe C, Leiter U. Melanoma epidemiology and trends. *Clin Dermatol* 2009;**27**(1):3-9.
10. Cancer Research UK.  
<http://cancerhelp.cancerresearchuk.org/type/melanoma/about/melanoma-risks-and-causes>. (last accessed 21 April 2014).
11. Balch CM, Gershenwald JE, Soong SJ, et al. Final version of 2009 AJCC melanoma staging and classification. *J Clin Oncol* 2009;**27**(36):6199-206 doi: 10.1200/JCO.2009.23.4799.
12. Martorell-Calatayud A, Nagore E, Botella-Estrada R, et al. Defining fast-growing melanomas: reappraisal of epidemiological, clinical, and histological features. *Melanoma Res* 2011;**21**(2):131-8 doi: 10.1097/CMR.0b013e328342f312.

- 1  
2  
3 13. Lyratzopoulos G, Abel GA, McPhail S, et al. Measures of promptness of cancer diagnosis in  
4 primary care: secondary analysis of national audit data on patients with 18 common and  
5 rarer cancers. *Br J Cancer* 2013;**108**(3):686-90 doi: 10.1038/bjc.2013.1.  
6
- 7  
8 14. Lin JS, Eder M, Weinmann S. Behavioral counseling to prevent skin cancer: a systematic review  
9 for the U.S. Preventive Services Task Force. *Annals of Internal Medicine* 2011;**154**(3):190-201  
10 doi: 10.1059/0003-4819-154-3-201102010-00009.  
11
- 12  
13 15. Baughan P, O'Neill B, Fletcher E. Auditing the diagnosis of cancer in primary care: the experience  
14 in Scotland. *Br J Cancer* 2009;**101 Suppl 2**:S87-91 doi: 10.1038/sj.bjc.6605397.  
15
- 16  
17 16. Keeble S, Abel GA, Saunders CL, et al. Variation in promptness of presentation among 10,297  
18 patients subsequently diagnosed with one of 18 cancers: Evidence from a national audit of  
19 cancer diagnosis in primary care. *Int J Cancer* 2014 doi: 10.1002/ijc.28763.  
20
- 21  
22 17. Austoker J, Bankhead C, Forbes LJ, et al. Interventions to promote cancer awareness and early  
23 presentation: systematic review. *Br J Cancer* 2009;**101 Suppl 2**:S31-9 doi:  
24 10.1038/sj.bjc.6605388.  
25
- 26  
27 18. Branstrom R, Hedblad MA, Krakau I, et al. Reasons to seek medical attention for a skin check-up:  
28 the layman's perspective. *Eur J Public Health* 2003;**13**(4):294-8.  
29
- 30  
31 19. Walter FM, Humphrys E, Tso S, et al. Patient understanding of moles and skin cancer, and factors  
32 influencing presentation in primary care: a qualitative study. *BMC Fam Pract* 2010;**11**:62 doi:  
33 10.1186/1471-2296-11-62.  
34
- 35  
36 20. Emery JD, Walter FM, Gray V, et al. Diagnosing cancer in the bush: a mixed-methods study of  
37 symptom appraisal and help-seeking behaviour in people with cancer from rural Western  
38 Australia. *Fam Pract* 2013;**30**(3):294-301 doi: 10.1093/fampra/cms087.  
39
- 40  
41 21. Walter FM, Webster A, Scott S, et al. The Andersen Model of Total Patient Delay: a systematic  
42 review of its application in cancer diagnosis. *J Health Serv Res Policy* 2012;**17**(2):110-8 doi:  
43 10.1258/jhsrp.2011.010113.  
44
- 45  
46 22. Scott SE, Walter FM, Webster A, et al. The model of pathways to treatment: conceptualization  
47 and integration with existing theory. *Br J Health Psychol* 2013;**18**(1):45-65 doi:  
48 10.1111/j.2044-8287.2012.02077.x.  
49
- 50  
51 23. Glasner T, van der Vaart W. Applications of calendar instruments in social surveys: a review. *Qual*  
52 *Quant* 2009;**43**(3):333-49 doi: 10.1007/s11135-007-9129-8.  
53
- 54  
55 24. Oral presentation, BPS Division of Health Psychology Annual Conference, Brighton, UK.  
56
- 57  
58 25. Fitzpatrick TB, Sober AJ. Sunlight and skin cancer. *N Engl J Med* 1985;**313**(13):818-20 doi:  
59 10.1056/NEJM198509263131310.  
60

- 1  
2  
3 26. Gale NK, Heath G, Cameron E, et al. Using the framework method for the analysis of qualitative  
4 data in multi-disciplinary health research. *BMC Med Res Methodol* 2013;**13**:117 doi:  
5 10.1186/1471-2288-13-117.  
6  
7  
8 27. Weller D, Vedsted P, Rubin G, et al. The Aarhus statement: improving design and reporting of  
9 studies on early cancer diagnosis. *Br J Cancer* 2012;**106**(7):1262-7 doi: 10.1038/bjc.2012.68.  
10  
11 28. Hansen RP, Vedsted P, Sokolowski I, et al. Time intervals from first symptom to treatment of  
12 cancer: a cohort study of 2,212 newly diagnosed cancer patients. *BMC Health Serv Res*  
13 2011;**11**:284 doi: 10.1186/1472-6963-11-284.  
14  
15  
16 29. Mackie RM, Doherty VR. Seven-point checklist for melanoma. *Clin Exp Dermat* 1991;**16**(2):151-3.  
17  
18  
19 30. Mills K, Cheung C, Hall N, et al. Using calendar landmarking instruments may aid patient recall of  
20 cancer symptom time intervals from onset to diagnosis. In submission.  
21  
22 31. Nyawata I, Topping A. Symptom interpretation as a source of delay in malignant melanoma  
23 presentation - A literature review. *Clinical Effectiveness in Nursing* 2006;**9**:e68-e78.  
24  
25  
26 32. Topping A, Nkosana-Nyawata I, Heyman B. 'I am not someone who gets skin cancer': risk, time  
27 and malignant melanoma. *Health, Risk and Society* 2013;**15**(6-7):596-614.  
28  
29  
30 33. Richard MA, Grob JJ, Avril MF, et al. Delays in diagnosis and melanoma prognosis (I): the role of  
31 patients. *Int J Cancer* 2000;**89**(3):271-79.  
32  
33 34. Baade PD, English DR, Youl PH, et al. The relationship between melanoma thickness and time to  
34 diagnosis in a large population-based study. *Arch Dermatol* 2006;**142**(11):1422-27.  
35  
36  
37 35. Simon AE, Waller J, Robb K, et al. Patient delay in presentation of possible cancer symptoms: the  
38 contribution of knowledge and attitudes in a population sample from the United Kingdom.  
39 *Cancer Epidemiol Biomarkers Prev* 2010;**19**(9):2272-7 doi: 10.1158/1055-9965.EPI-10-0219.  
40  
41  
42 36. Forbes LJ, Simon AE, Warburton F, et al. Differences in cancer awareness and beliefs between  
43 Australia, Canada, Denmark, Norway, Sweden and the UK: do they contribute to differences  
44 in cancer survival? *Br J Cancer* 2013;**108**(2):292-300 doi: 10.1038/bjc.2012.542.  
45  
46  
47 37. Aldridge RB, Zanotto M, Ballerini L, et al. Novice identification of melanoma: not quite as  
48 straightforward as the ABCDs. *Acta Dermato-Venereologica* 2011;**91**(2):125-30 doi:  
49 10.2340/00015555-1070.  
50  
51  
52 38. Mitchell E, Rubin G, Macleod U. Improving diagnosis of cancer- a toolkit for General Practice,  
53 Royal College of General Practitioners, 2012.  
54  
55 39. Tyagi A, Miller K, Cockburn M. e-Health Tools for Targeting and Improving Melanoma Screening:  
56 A Review. *Journal of Skin Cancer* 2012;**2012**:437502 doi: 10.1155/2012/437502.  
57  
58  
59  
60

1  
2  
3 40. Mackie R. *Malignant Melanoma. A Guide to Early Diagnosis*: Glasgow University Department of  
4 Dermatology, 1989.  
5  
6  
7  
8  
9  
10  
11  
12  
13  
14  
15  
16  
17  
18  
19  
20  
21  
22  
23  
24  
25  
26  
27  
28  
29  
30  
31  
32  
33  
34  
35  
36  
37  
38  
39  
40  
41  
42  
43  
44  
45  
46  
47  
48  
49  
50  
51  
52  
53  
54  
55  
56  
57  
58  
59  
60

For peer review only

**Table 1. Characteristics of study participants (n=63), and clinical characteristics of their melanomas, comparing thinner (n=33) and thicker (n=30) melanomas.**

|                                                             | Thinner melanomas<br>( $<1\text{mm}$ Breslow thickness) | Thicker melanomas<br>( $>2\text{mm}$ Breslow thickness) |
|-------------------------------------------------------------|---------------------------------------------------------|---------------------------------------------------------|
| <b>Age at interview</b>                                     |                                                         |                                                         |
| Mean age $\pm$ s.d. (range)                                 | 60.5 $\pm$ 14.6 (29 – 85)                               | 66.1 $\pm$ 15.5 (36 – 93)                               |
| Less than 60 years (n=23)                                   | 14 (61%)                                                | 9 (39%)                                                 |
| 60 years and over (n=40)                                    | 19 (47%)                                                | 21 (53%)                                                |
| <b>Gender</b>                                               |                                                         |                                                         |
| Male                                                        | 14 (42%)                                                | 17 (58%)                                                |
| Female                                                      | 19 (58%)                                                | 13 (42%)                                                |
| <b>Education</b>                                            |                                                         |                                                         |
| No further education                                        | 21 (64%)                                                | 21 (70%)                                                |
| Further education                                           | 12 (36%)                                                | 9 (30%)                                                 |
| <b>Fitzpatrick scale: skin colour <sup>a</sup></b>          |                                                         |                                                         |
| Type I (white skin, v fair)                                 | 7 (21%)                                                 | 2 (6%)                                                  |
| Type II (white skin, fair)                                  | 6 (18%)                                                 | 11 (37%)                                                |
| Type III (creamy white, any hair)                           | 17 (52%)                                                | 16 (53%)                                                |
| Type IV (brown, Mediterranean)                              | 3 (9%)                                                  | 1 (3%)                                                  |
| <b>Fitzpatrick scale: skin reaction to sun <sup>a</sup></b> |                                                         |                                                         |
| Type I (always burns, never tans)                           | 4 (12%)                                                 | 3 (10%)                                                 |
| Type II (usually burns, tans with difficulty)               | 11 (33%)                                                | 10 (33%)                                                |
| Type III (sometimes mild burn, gradually tans)              | 10 (30%)                                                | 11 (37%)                                                |
| Type IV (rarely burns, tans easily)                         | 6 (18%)                                                 | 6 (20%)                                                 |
| Type V (very rarely burns, tans very easily)                | 2 (7%)                                                  | 0                                                       |
| <b>Melanoma location</b>                                    |                                                         |                                                         |
| Head & neck                                                 | 6 (18%)                                                 | 9 (30%)                                                 |
| Trunk <sup>b</sup>                                          | 9 (27%)                                                 | 4 (14%)                                                 |
| Upper limb                                                  | 10 (30%)                                                | 7 (23%)                                                 |
| Lower limb                                                  | 8 (24%)                                                 | 10 (33%)                                                |
| <b>Melanoma type</b>                                        |                                                         |                                                         |
| Superficial spreading melanoma (SSM)                        | 25 (76%)                                                | 10 (33%)                                                |
| Nodular melanoma (NM)                                       | 0                                                       | 10 (33%)                                                |
| Lentigo maligna melanoma (LMM)                              | 7 (21%)                                                 | 2 (7%)                                                  |
| Others <sup>c</sup>                                         | 1 (3%)                                                  | 8 (27%)                                                 |
| <b>Melanoma TMN stage</b>                                   |                                                         |                                                         |
| Stage I <sup>d</sup>                                        | 33 (100%)                                               | 0                                                       |
| Stage II <sup>e</sup>                                       | 0                                                       | 23 (77%)                                                |
| Stage III <sup>f</sup>                                      | 0                                                       | 7 (23%)                                                 |



|          |   |   |
|----------|---|---|
| Stage IV | 0 | 0 |
|----------|---|---|

<sup>a</sup> Self-reported, not verified in medical records.

<sup>b</sup> Includes melanomas on the back (thinner 6, 18%; thicker 3, 10%).

<sup>c</sup> Thinner: mixed type (SSM & NM) x 1; Thicker: LMM 2, acral 1, malignant blue naevus 1, unclassified 6.

<sup>d</sup> Stage IA = 27, stage IB = 6. <sup>e</sup> Stage IIA = 11, stage IIB = 5, Stage IIC = 7. <sup>f</sup> Stage IIIA = 6, stage IIIB = 1.

For peer review only

**Table 2. Illustrative quotations of a ‘mis-match’ between observed skin changes and ‘mental images’ of a melanoma**

|                                                                                                                                                                                                                                                                                                                                                                                                                                                                                                                                                                                                                                                                                                                                                                                                                                                                                                                                                                                                                                                                                                                                                                                                                                                                                                                                                                                           |
|-------------------------------------------------------------------------------------------------------------------------------------------------------------------------------------------------------------------------------------------------------------------------------------------------------------------------------------------------------------------------------------------------------------------------------------------------------------------------------------------------------------------------------------------------------------------------------------------------------------------------------------------------------------------------------------------------------------------------------------------------------------------------------------------------------------------------------------------------------------------------------------------------------------------------------------------------------------------------------------------------------------------------------------------------------------------------------------------------------------------------------------------------------------------------------------------------------------------------------------------------------------------------------------------------------------------------------------------------------------------------------------------|
| <p><b>Comparison with experience of a family member’s melanoma</b></p> <p>‘My mother in law had skin cancer on her back, so I expected melanoma to be much bigger: my little mole was nothing.’ [F, 53, thinner, SSM, 14w/52w]</p>                                                                                                                                                                                                                                                                                                                                                                                                                                                                                                                                                                                                                                                                                                                                                                                                                                                                                                                                                                                                                                                                                                                                                        |
| <p><b>Comparison with information</b></p> <p>‘I suppose from the descriptions that I’ve read about melanomas.. it didn’t ring any alarm bells... Okay, it has to start somewhere but, as it developed, [I expected] it would become more raised, it would be scaly and rough, it would be more inflamed-looking. But because this just remained completely flat on the skin...it didn’t meet any profile that I was expecting.’ [F, 63, thinner, LMM, 104w]</p> <p>‘It’s not like a mole, you can see a mole changing colour or shape or texture, you can read all about that, but as my wife says, nothing in the leaflets says anything about under the nail.’ [M, 60, thicker, other, 1w]</p> <p>‘..Because melanomas, he says, are black. Now, this growth on my knee, it was just like a warty growth, with a scarlet top on it, and.. there was no discolouration in it at all. ...I think that’s maybe how a lot of folk’ll not think of these things, because it doesn’t look like what you think it’s supposed to be, if you ken what I mean. It’s just like a bit of skin rising up.’ [M, 52, thicker, SSM, 42w]</p>                                                                                                                                                                                                                                                            |
| <p><b>Comparison with images</b></p> <p>‘I think that the way melanomas are publicised, this is what they look like, that’s really misleading ‘cos that isn’t what mine looked like until I saw it blown up on [the dermatologist]’s screen, and I thought ‘oh my God, yeah, mine does look like one of the ones on the front of the leaflet’ but... it just looks very neat, symmetrical, you know, sharp edges.’ [F, 39, thinner, other, 78w]</p> <p>‘When you go to the hospital and you see the things on the walls, and on the internet, and you see the diagrams of it, that is to me what malignant melanoma looks like. Mine didn’t look... it just didn’t come into the category of melanoma, it hadn’t [gone] funny shaped, it hadn’t been jaggy, it didn’t go dark, it didn’t get bigger...it just wasn’t what I imagined melanoma to look like. I think of [melanoma] getting bigger, crustier, bleeding ... and this was... dead flat... none of the things that were there at the back of my mind actually rang any alarm bells.’ [F, 58, thinner, SSM, 22w]</p> <p>‘It didn’t look like a melanoma. Even the booklet I’ve got given since... four or six pictures in there of actually different ones and it didn’t look like one of them. ... Even like the doctor said “I’ve noticed it on there before but I didn’t take any notice”.’ [M, 36, thicker, NM, 78w/3w]</p> |
| <p><b>Comparison with knowledge of other cancers</b></p> <p>‘I think if I could feel pain and know what it was, I may be more responsive to getting it treated’ [M, 74, thinner, LMM, 303w]</p>                                                                                                                                                                                                                                                                                                                                                                                                                                                                                                                                                                                                                                                                                                                                                                                                                                                                                                                                                                                                                                                                                                                                                                                           |

Table 3. Descriptions of skin changes, using the Glasgow seven-point checklist (7PCL) criteria [40] and other descriptions (Dis-confirming reports in pink)

| Feature<br>- Subgroups                         | Way feature was described                                                                                                                      |                                                                                                                               | Thinner                                                                       |            |              | Thicker    |             |                        |
|------------------------------------------------|------------------------------------------------------------------------------------------------------------------------------------------------|-------------------------------------------------------------------------------------------------------------------------------|-------------------------------------------------------------------------------|------------|--------------|------------|-------------|------------------------|
|                                                | Thinner                                                                                                                                        | Thicker                                                                                                                       | SSM<br>n=25                                                                   | LMM<br>n=7 | Other<br>n=1 | NM<br>n=10 | SSM<br>n=10 | LMM/<br>Others<br>n=10 |
| <b>1 7PCL criteria</b>                         |                                                                                                                                                |                                                                                                                               |                                                                               |            |              |            |             |                        |
| <b>1.1. Changing size</b><br>i Cover more skin | <i>'it had grown, it looked bigger'</i><br>[M,48,SSM,2w]                                                                                       | <i>'getting bigger, but not ultra-big, no-one noticed'</i> [M,66, other,136w]                                                 | ●                                                                             | ●          | ●            | ●          | ●           | ●                      |
|                                                | <i>'dark brown part was .. more raised'</i><br>[F,40,SSM,3w]                                                                                   | <i>'vertical before it curved across at the top'</i><br>[M,45,SSM,4w/52w], <i>'mushroomed out... bubbled up'</i> [M,78,NM,8w] | ●                                                                             |            |              | ●          | ●           | ●                      |
|                                                | No changing size- flat to skin                                                                                                                 |                                                                                                                               | ●                                                                             |            |              |            |             |                        |
| <b>1.2. Changing and/or irregular shape</b>    | <i>'it sort of made.. a pinky horseshoe'</i><br>[F,53,SSM,14w/52w], <i>'maple-leaf raggedy'</i><br>[F,63, LMM,104w]                            | <i>'breaking into several bits'</i><br>[F,48,other,4w/78w]                                                                    | ●                                                                             | ●          | ●            |            | ●           | ●                      |
|                                                | No changing shape- smooth edge                                                                                                                 |                                                                                                                               | ●                                                                             |            |              |            |             |                        |
| <b>1.3. Changing and/or irregular colour</b>   | <i>'two colours, dark with a lighter section'</i><br>[M,37,SSM,52w], <i>'slight discolour that got darker, black like oil'</i> [M,67,SSM,208w] | <i>'red then turned black, lively-looking'</i><br>[M,73,other,104w], <i>'several different colours'</i> [M,82,other,3w]       | ●                                                                             | ●          | ●            | ●          | ●           | ●                      |
|                                                | No changing colour (not always darker)                                                                                                         |                                                                                                                               | ●                                                                             |            |              | ●          | ●           | ●                      |
| <b>1.4. Oozing</b><br>i Bleeding               | <i>'a new shaving blade would nick it but didn't bleed on its own'</i> [M,74,LMM,303w]                                                         | <i>'noticed blood on the pillow'</i><br>[M,66,NM,78w], <i>'forever bleeding and getting a scab'</i> [M,86,SSM,52w]            | ●                                                                             | ●          |              | ●          | ●           | ●                      |
|                                                | ii Discharge                                                                                                                                   | -                                                                                                                             |                                                                               |            |              | ●          | ●           | ●                      |
| <b>1.5. Changing sensation</b><br>i Itch       | <i>'when it felt itchy and I peeled like flaked off bits of it'</i> [M,67,SSM,208w]                                                            | <i>'it was within a mole, just the smallest pimple, a red itchy spot'</i> [M,45,SSM,4w/52w]                                   | ●                                                                             |            |              | ●          | ●           | ●                      |
|                                                | ii Soreness                                                                                                                                    | <i>'when caught my nail on it a little bit sore'</i><br>[F,40,SSM,3w]                                                         | <i>'painful sort of like a wasp sting'</i><br>[M,60,NM,1w]                    | ●          |              |            | ●           | ●                      |
| <b>1.6. Inflammation</b><br>i Texture change   | <i>'quite bumpy'</i> [M,63,SSM,2w/104w]                                                                                                        | <i>'bubbled up'</i> [M,78,NM,8w]                                                                                              | ●                                                                             |            |              | ●          | ●           | ●                      |
|                                                | ii Crusty, flaky                                                                                                                               | <i>'it was very dry, a bit scaly'</i> [F,37,SSM,8w]                                                                           | <i>'dark leathery, I tried to keep it moisturised'</i><br>[F,48,other,4w/78w] | ●          | ●            |            | ●           | ●                      |

1  
2  
3  
4  
5  
6  
7  
8  
9  
10  
11  
12  
13  
14  
15  
16  
17  
18  
19  
20  
21  
22  
23  
24  
25  
26  
27  
28  
29  
30  
31  
32  
33  
34  
35  
36  
37  
38  
39  
40  
41  
42  
43  
44  
45  
46  
47  
48  
49

|                                                                |                                                                                                                                              |                                                                                                                                                         |   |   |   |   |   |   |
|----------------------------------------------------------------|----------------------------------------------------------------------------------------------------------------------------------------------|---------------------------------------------------------------------------------------------------------------------------------------------------------|---|---|---|---|---|---|
| <b>1.7 Large size</b>                                          | <i>'larger than a mole, about the size of a one penny piece' [F,66,LMM,20w/78w]</i><br><i>'size of a thumb nail' [F,63,LMM,104w]</i>         | <i>'It was like a 2p piece' [M,82,other,3w]</i><br><i>'felt this huge lump' [M,40,other,4w/68w]</i>                                                     | • | • |   | • | • | • |
| <b>2 Other descriptions</b>                                    |                                                                                                                                              |                                                                                                                                                         |   |   |   |   |   |   |
| <b>2.1 'Different'</b>                                         | <i>'look very different from all the others' [M,63,SSM,2w/104w]</i><br><i>'not like the rest of my moles' [F,37,SSM,8w]</i>                  | <i>'quite a big mole, nothing wrong until the spot on top' [F,54,SSM,1w], 'two were different, more livelier than the other ones' [M,73,other,104w]</i> | • |   |   |   |   | • |
| <b>2.2 Small size</b><br>i Tiny/small mole<br>li 'just a spot' | <i>'tiny, wee circular mole' [F,43,LMM, 22w]</i><br><i>'a little black spot, just an aging spot' [F,76,LMM,16w]</i>                          | <i>'it was so minuscule' [M,93,LMM,22w]</i><br><i>'it was nothing like a mole at all, it was just like a spot' [M,64,other,20w]</i>                     | • | • |   | • | ● | • |
| <b>2.3 New lesion</b>                                          | <i>'somebody else has noticed it so it must be a new one' [F,43,LMM,22w]</i> <i>'the mole had appeared, it was a new mole' [F,29,SSM,3w]</i> | <i>'just suddenly appeared' [F,57,NM,36w]</i><br><i>'came very quick; it wasn't there and then it was there' [F,76,SSM,4w]</i>                          | • | • |   | • | • | • |
| <b>2.4 'Always there'</b>                                      | <i>'had been there for literally years' [M,74,SSM,14w], 'a birthmark, heart shaped, an old friend' [F,39,other,78w]</i>                      | <i>'been there from birth' [F,56,NM,10w/16w]</i><br><i>'always had that mole, it didn't bother me' [F,61,SSM,26w]</i>                                   | • | • | • | • | • | • |

Reported feature per group: • = 1-25%; ● = 25-50%; ● = 50-75%; ● = 75-100%

**Table 4. Illustrative quotations of the influences of comments from extended family and friends**

**Noticing a skin change**

'My partner's daughter says to me "Have you always had that mole on your ear?" So I thought well somebody else has noticed it so it must be a new one.' [F, 43, thinner, LMM, 22w]

'I saw my sisters at the funeral and they both mentioned it; we hadn't noticed it.' [M, 66, thicker, NM, 78w]

**Acting on encouragement to seek help**

'It wasn't till my daughter-in-law come over from Australia, and she said to me that she thought I ought to have it checked out because obviously in Australia they're very conscious of it all.' [F, 58, thinner, SSM, 22w]

'The girl in the beauty salon... she always asked me about this one... and then I went again and she said, "have you seen a doctor?", I said, "no, I don't because it's nothing, I feel okay", and she said, "no, please, I will make you a cup of tea, I will give you a phone number, please go this week." [F, 40, thinner, SSM, 156w]

'I was at a dinner with my daughter, and fortunately I had a low backed dress on, and one of her friends said, "I don't like the look of that mole on your back, and I suggest you have it checked out."' [F, 66, thicker, SSM, 4w]

'It dinnae change dramatically, so one day I quietly said to nurse friend, "Will you just have a look at this for me?" She just took one look and she says "You must promise me when you get home you will go and see the doctor." [F, 61, thicker, SSM, 26w]

**Advice of others having little effect**

'She thought it was getting darker at some stage, can't remember exactly when, but she maybe nagged me for a year or two before.' [M, 67, thinner, SSM, 208w]

'It's not as if I hadnae been told to go and see about it, because my daughter and my wife... they said, "Well you should go and see about that," but I never did, you know, until May.' [M, 64, thicker, other, 20w]

**Not encouraging help seeking**

'Fairly early on I discussed it with (a friend). ... But because she said, "I can't really feel it" I think I ignored it. It would have been better if she'd said to me, "I think you need to have it looked at." I think I'd have gone to the doctor then, but because she said, "No, I think it's fine" I think I left it. [F, 64, thicker, LMM, 104 w]

Table 5. Time from first detecting a skin change to first presentation, and first to second presentations to primary care, by time intervals (ordered by first TTP), gender, age, melanoma type and stage

|                          | Time from detecting a skin change to first presentation | Time from first presentation to second presentation | Gender & age | Type & stage |
|--------------------------|---------------------------------------------------------|-----------------------------------------------------|--------------|--------------|
| <b>Thinner melanomas</b> |                                                         |                                                     |              |              |
| 1                        | 2w                                                      | 104w                                                | M, 63        | SSM, IA      |
| 2                        | 4w                                                      | 22w                                                 | F, 58        | SSM, IA      |
| 3                        | 14w                                                     | 52w                                                 | F, 53        | SSM, IA      |
| 4                        | 20w                                                     | 78w                                                 | F, 66        | LMM, IA      |
| <b>Thicker melanomas</b> |                                                         |                                                     |              |              |
| 5                        | 1w                                                      | 17w                                                 | M, 75        | SSM, IIC     |
| 6                        | 3w                                                      | 1w                                                  | M, 73        | NM, IIB      |
| 7                        | 4w                                                      | 52w                                                 | M, 45        | SSM, IIA     |
| 8                        | 4w                                                      | 68w                                                 | M, 40        | Other, IIIA  |
| 9                        | 4w                                                      | 78w                                                 | F, 48        | Acral, IIIA  |
| 10                       | 10w                                                     | 16w                                                 | F, 56        | NM, IIIA     |
| 11                       | 78w                                                     | 3w                                                  | M, 36        | NM, IIA      |

Figure 1. Model of Pathways to Treatment (reproduced with permission from Walter et al.2012 [21])

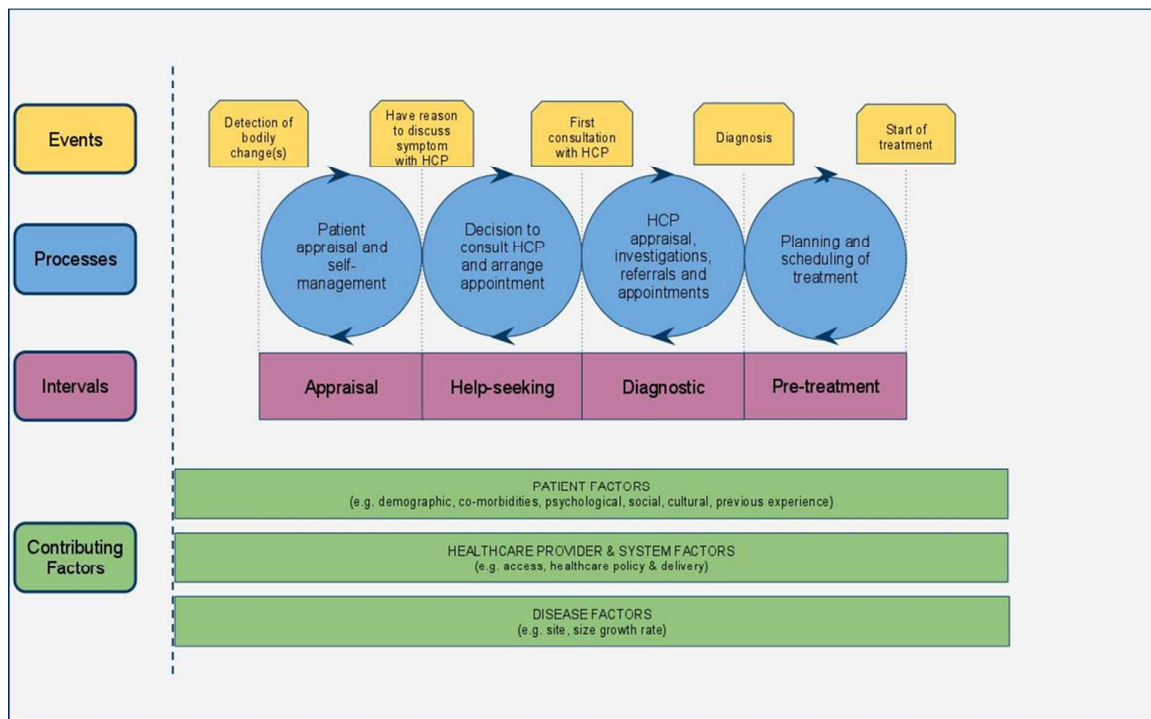

Review only

# BMJ Open

## 'This isn't what mine looked like': a qualitative study of symptom appraisal and help seeking in people recently diagnosed with melanoma

|                                 |                                                                                                                                                                                                                                                                                                                                                                                                                                                                                                                                                                                                                                                                                                                                                           |
|---------------------------------|-----------------------------------------------------------------------------------------------------------------------------------------------------------------------------------------------------------------------------------------------------------------------------------------------------------------------------------------------------------------------------------------------------------------------------------------------------------------------------------------------------------------------------------------------------------------------------------------------------------------------------------------------------------------------------------------------------------------------------------------------------------|
| Journal:                        | <i>BMJ Open</i>                                                                                                                                                                                                                                                                                                                                                                                                                                                                                                                                                                                                                                                                                                                                           |
| Manuscript ID:                  | bmjopen-2014-005566.R1                                                                                                                                                                                                                                                                                                                                                                                                                                                                                                                                                                                                                                                                                                                                    |
| Article Type:                   | Research                                                                                                                                                                                                                                                                                                                                                                                                                                                                                                                                                                                                                                                                                                                                                  |
| Date Submitted by the Author:   | 18-Jun-2014                                                                                                                                                                                                                                                                                                                                                                                                                                                                                                                                                                                                                                                                                                                                               |
| Complete List of Authors:       | Walter, Fiona; University of Cambridge, Dept of Public Health and Primary Care<br>Birt, Linda; University of Cambridge, Public Health & Primary Care<br>Cavers, Debbie; University of Edinburgh, General Practice<br>Scott, Suzanne; Kings College London Dental Institute, Unit of Social & Behavioural Sciences<br>Emery, Jon; University of Melbourne, General Practice and Primary Care Academic Centre; University of Cambridge, Public Health & Primary Care<br>Burrows, Nigel; Addenbrooke's Hospital,<br>Kavanagh, Gina; Royal Infirmary of Edinburgh,<br>MacKie, Rona; University of Glasgow,<br>Weller, David; University of Edinburgh, General Practice<br>Campbell, Christine; University of Edinburgh, Centre for Population Health Sciences |
| <b>Primary Subject Heading</b>: | Oncology                                                                                                                                                                                                                                                                                                                                                                                                                                                                                                                                                                                                                                                                                                                                                  |
| Secondary Subject Heading:      | Dermatology, Diagnostics, General practice / Family practice, Qualitative research, Oncology                                                                                                                                                                                                                                                                                                                                                                                                                                                                                                                                                                                                                                                              |
| Keywords:                       | Dermatological tumours < DERMATOLOGY, PRIMARY CARE, QUALITATIVE RESEARCH                                                                                                                                                                                                                                                                                                                                                                                                                                                                                                                                                                                                                                                                                  |
|                                 |                                                                                                                                                                                                                                                                                                                                                                                                                                                                                                                                                                                                                                                                                                                                                           |

SCHOLARONE™  
Manuscripts



1  
2  
3  
4  
5  
6  
7  
8  
9 **'This isn't what mine looked like': a qualitative study of symptom**  
10 **appraisal and help seeking in people recently diagnosed with**  
11 **melanoma**  
12  
13

14  
15  
16 Fiona M Walter<sup>1,2</sup>, Linda Birt<sup>1</sup>, Debbie Cavers<sup>3</sup>, Suzanne Scott<sup>4</sup>, Jon Emery<sup>2,1</sup>, Nigel Burrows<sup>5</sup>,  
17 Gina Cavanagh<sup>6</sup>, Rona MacKie<sup>7</sup>, David Weller<sup>3</sup>, Christine Campbell<sup>3</sup>  
18  
19

20  
21  
22  
23  
24  
25 <sup>1</sup> The Primary Care Unit, University of Cambridge CB1 8RN, UK  
26

27 <sup>2</sup> University of Melbourne, Australia  
28

29 <sup>3</sup> University of Edinburgh, UK  
30

31 <sup>4</sup> Unit of Social & Behavioural Sciences, Kings College London Dental Institute, UK  
32

33 <sup>5</sup> Cambridge University Hospitals NHS Trust, Cambridge, UK  
34

35 <sup>6</sup> Royal Infirmary of Edinburgh, NHS Lothian, UK  
36

37 <sup>7</sup> University of Glasgow, UK  
38  
39  
40  
41  
42

43  
44 Correspondence to: Fiona M Walter [fmw22@medschl.cam.ac.uk](mailto:fmw22@medschl.cam.ac.uk)  
45  
46  
47  
48  
49  
50  
51  
52  
53  
54  
55  
56  
57  
58  
59  
60

## ABSTRACT

### Objective

To explore symptom appraisal and help-seeking decisions among patients recently diagnosed with melanomas, and to compare experiences of people with 'thinner' (<1mm) and 'thicker' (>2mm) melanomas, as thickness at diagnosis is an important prognostic feature.

### Methods

In-depth interviews with patients within ten weeks of melanoma diagnosis explored the factors impacting on their pathways to diagnosis. Framework analysis, underpinned by the Model of Pathways to Treatment, was used to explore the data with particular focus on patients' beliefs and experiences, disease factors, and healthcare professional (HCP) influences.

### Results

63 patients were interviewed (29-93 years, 31 women, 30 thicker melanomas). All described their skin changes using rich lay vocabulary. Many included unassuming features such as 'just a little spot' as well as common features of changes in size, colour and shape. There appeared to be subtly different patterns of symptoms: descriptions of vertical growth, bleeding, oozing and itch were features of thicker melanomas irrespective of pathological type.

Appraisal was influenced by explanations such as normal life changes, prior beliefs, and whether skin changes matched known melanoma descriptions. Most decisions to seek help were triggered by common factors such as advice from family and friends. Eleven patients reported previous reassurance about their skin changes by a HCP, with little guidance on monitoring change or when it would be appropriate to re-consult.

### Conclusions

Patients diagnosed with both thinner and thicker melanomas often did not initially recognise or interpret their skin changes as warning signs or prompts to seek timely medical attention. The findings provide guidance for melanoma awareness campaigns on more appropriate images, helpful descriptive language, and the need to stress the often apparently innocuous nature of potentially serious skin changes. The importance of appropriate advice, monitoring and safety-netting procedures by HCPs for people presenting with skin changes is also highlighted.

1  
2  
3  
4  
5  
6  
7  
8  
9  
10  
11  
12  
13  
14  
15  
16  
17  
18  
19  
20  
21  
22  
23  
24  
25  
26  
27  
28  
29  
30  
31  
32  
33  
34  
35  
36  
37  
38  
39  
40  
41  
42  
43  
44  
45  
46  
47  
48  
49  
50  
51  
52  
53  
54  
55  
56  
57  
58  
59  
60

For peer review only

DRAFT

### STRENGTHS AND LIMITATIONS OF THIS STUDY

- This study is the first exploration of symptom appraisal and help-seeking among people diagnosed with ‘thinner’ melanomas (T1, very good prognosis, 5 year disease-free prospects 95%), compared with those with ‘thicker’ melanomas (T3 and T4, less good prognosis, 5 year disease-free prospects <55%).
- The study did not identify clear discriminating features in the diagnostic pathway, or features of thinner versus thicker melanomas.
- The findings highlight a mismatch between the information people need when assessing their skin changes and the information and images currently available, thus providing opportunities to incorporate more appropriate descriptive language, images and information into targeted community awareness campaigns as well as by the NHS and charities via their websites and promotional materials.
- A small but important minority of participants did not have their developing melanomas recognised during their first primary care consultation, and were not provided with enough information about on-going assessment of further skin changes or when to return to their clinician. These ‘safety-netting’ opportunities could be improved by more systematic approaches by HCPs.
- Using semi-structured interviews close to diagnosis allowed in-depth exploration of the participants’ experiences and views, but the accounts are necessarily retrospective and subject to recall and framing bias.

## INTRODUCTION

Diagnosing melanoma earlier is high on the UK health policy agenda; it is estimated that around 190 deaths from melanoma could be avoided each year if survival rates in England matched the best in Europe [1]. Worldwide melanoma incidence rates are increasing faster than any other solid tumour. In the UK the incidence has quadrupled since the 1970s [2]; similar incidence rises have been reported across Europe [3,4], the USA [5] and Australia [6]. In the UK there were more than 2,209 deaths and 12,800 new cases diagnosed in 2011, with a disproportionately high rate among people aged less than fifty years [2]. The most important prognostic factor is the tumour thickness at diagnosis according to the Breslow scale (T classification) [7]. Patients with a primary melanoma  $\leq 1$ mm at diagnosis (T1) currently have 5 year disease-free prospects of over 95%, while for tumours  $\geq 2$ mm at diagnosis this is lower, falling to  $< 55\%$  with lymph node involvement but no metastatic spread [8]. Tumour thickness is also associated with rapid growth which occurs more frequently in elderly men [9].

Timely diagnosis can be influenced by the diagnostic skills of GPs. A recent analysis of the Cancer Patient Experiences Survey 2009 and the 2010 RCGP cancer audit data reported that more than 90% of people diagnosed with melanoma were seen by their GPs less than three times before diagnosis, compared with 60-80% for the majority of cancer types [10]. This suggests that most melanomas are recognised by GPs and appropriately referred to specialist care in England.

Timely diagnosis can also be influenced by people's symptom appraisal and help-seeking behaviour. Compared with other cancers, people with melanoma have among the longest time between first noticing a symptom and presenting to their GP [11,12], suggesting that the major opportunity to diagnose melanoma earlier is prompting earlier presentation to healthcare through signs and symptom awareness campaigns [13]. This requires an understanding of how people interpret changes in their moles or new lesions. We present findings from an in-depth interview study with UK patients recently diagnosed with 'thinner' (T1) compared with 'thicker' primary melanomas (T3 and T4), which aimed to explore the processes and experiences of symptom detection and help-seeking decisions leading to melanoma diagnosis.

## METHODS

### Design and ethics

Semi-structured face to face in-depth interviews were conducted with adults diagnosed with invasive cutaneous melanoma within the previous ten weeks. Ethics approval was obtained from the Cambridgeshire 4 Research Ethics Committee (11/EE/0076).

## Setting and recruitment

Potential participants were identified and recruited by the melanoma/skin cancer nurse specialists via the weekly multidisciplinary team meetings of dermatologists, plastic surgeons and oncologists at two regional hospitals: Cambridge University Hospitals NHS Foundation Trust in the East of England, and the Edinburgh Royal Infirmary, NHS Lothian, Scotland. These hospitals together serve a population of approximately 1.4 million, and the MDT meetings review more than 400 new cases of invasive cutaneous melanoma each year.

All adults aged 18 and over newly diagnosed with a primary invasive cutaneous melanoma (staged as  $\leq 1\text{mm}$  (T1, 'thinner') or  $\geq 2\text{mm}$  (T3 and T4, 'thicker') at the two participating hospitals were eligible for inclusion unless the melanoma/skin cancer nurse specialists felt that they were not suitable on clinical grounds (other severe physical or mental health conditions). Patients were mailed an invitation letter with a patient information sheet. As T3 and T4 melanomas are diagnosed at about 25% of the rate of T1 melanomas, we recruited all those with thicker melanomas who agreed to take part. At the same time we purposively sampled people with T1 melanomas by age, gender, location and season to ensure that we had a broad range of views and experiences, and we continued until saturation of data. Reasons for not selecting patients for interview included: sampling decisions (n=34), lost to follow-up (n=6), and ill-health (n=1).

## Data collection

Interviews were undertaken between January 2012 and January 2013. In each area an experienced researcher used a semi-structured approach, with an interview schedule informed from the literature [14,15], our collective expertise from interviewing patients recently diagnosed with other cancers [16], and a pilot study (n=17, conducted during the early stages of the study, and including patients interviewed >10 weeks post-diagnosis (n=12), or with melanoma histology which did not fit the inclusion criteria (n=5, Breslow thickness 1-2mm or indeterminate)). The theoretical approach of the Model of Pathways to Treatment [17,18] (Figure 1) was used to underpin the interview schedule, exploring the processes that occurred within each time-interval and focusing on: how initial symptoms were noticed; personal risk perceptions; the language used to describe symptoms and changes over time; the participant's decision-making and triggers to help-seeking; and the experience of the diagnostic process of primary and secondary care from the patient perspective. A calendar-landmarking technique [19] was used as an adjunct to the interviews, to establish the timing and details of events which led to the melanoma diagnosis, together with diaries and letters that participants referred to during this process. Participants were also invited make a pencil drawing/s of their skin cancer as it developed; on-going analyses are examining perceptions of lesions over time, and comparing the drawings with clinical images [20]. At the end of each interview, participants completed a

1  
2  
3 short questionnaire to provide demographic data, and information about their skin and hair  
4 colour and their skin's response to UV light using the widely validated Fitzpatrick Scale [21].  
5

6 Interviews were undertaken as soon as possible after diagnosis, with all interviews  
7 completed within 10 weeks of diagnosis, and the majority within 6 weeks. Interviews lasted  
8 between 40-65 minutes and were conducted primarily in the participant's home although  
9 two people chose to be interviewed in university offices. Patients were sometimes  
10 accompanied by a family member, usually spouse or daughter. Audio-recordings of  
11 interviews were professionally transcribed verbatim and anonymised.  
12  
13  
14  
15

## 16 **Analysis**

17 All interview transcripts were repeatedly read and re-read by the two researchers LB  
18 (nursing background) and DC (health services researcher), and the members of the 'core'  
19 analysis team also read the majority of the transcripts (FW, academic GP; SS, health  
20 psychologist; CC, primary care researcher). Analysis was an iterative process starting near  
21 the beginning of data collection and using the 17 pilot interviews to develop our analytic  
22 strategy. We used the approach of Framework analysis to create and establish meaningful  
23 patterns in five phases, namely: familiarization with the data, generating initial codes,  
24 inductively searching for themes among codes, index charting and mapping of data, before  
25 finally defining and naming themes [22]. The coding and data management were supported  
26 by NVivo software (QSR International, version 9). The Model of Pathways to Treatment  
27 (Figure 1) was also used to underpin the analysis with a theoretic model for the different  
28 intervals and processes that occur along the pathway to diagnosis and treatment, in order  
29 to accurately assess the time intervals, their content and context. The final themes were  
30 agreed through a series of meetings involving all five 'core' researchers, and a consensus  
31 meeting with the wider study team.  
32  
33  
34  
35  
36  
37  
38

39 The analysis focused on the main themes within the time to presentation (TTP), defined as  
40 from the first detection of skin change to the first consultation with a healthcare  
41 professional [23, 24]. This interval comprises the appraisal and help-seeking intervals  
42 [17,18], and the analysis examined patient and healthcare factors as well as 'disease'  
43 factors, relating to the developing melanoma. When the first consultation did not result in a  
44 referral, we also included further iterative processes until the next consultation in the  
45 analyses. Participants with shorter intervals tended to use diaries and have good recall of  
46 the relevant dates. People with longer intervals tended to have vaguer recollections,  
47 particularly around the time they had first detected any skin change. While participants  
48 were often able to discuss triggers to help-seeking, they were less able to recall the precise  
49 dates of these triggers, and we therefore do not present the separate durations of the  
50 appraisal and help-seeking intervals.  
51  
52  
53  
54  
55  
56  
57  
58  
59  
60

1  
2  
3 We went on to examine our themes by comparing narratives from participants diagnosed  
4 with thinner and thicker melanomas, and by the melanoma types within these groups. We  
5 further validated our themes by examining the whole dataset stratified by gender, by age  
6 (less than 60 vs 60 and over, and 80 and over), by educational level (no further education vs  
7 further education), and by geographical location (Cambridge vs Edinburgh). Credibility was  
8 increased by the two researchers together undertaking coding and producing code tables  
9 throughout the analytic process, and reaching consensus from the potentially wide range of  
10 interpretations across the 'core' analysis team.  
11  
12  
13

## 14 15 16 17 18 **RESULTS**

19 A total of 241 adult patients were approached to take part in this study (Cambridge 114,  
20 Edinburgh 127), 121 were willing to participate (50%: Cambridge 53%, Edinburgh 47%), and  
21 63 were interviewed.  
22  
23

### 24 25 26 **Patient characteristics**

27 Table 1 shows the demographic and self-reported skin characteristics of the 63 study  
28 participants, and the clinical characteristics of their melanomas, comparing participants with  
29 thinner (n=33, median Breslow thickness 0.5 mm, range 0.1-0.9 mm) and thicker (n=30,  
30 median Breslow thickness 3.5 mm, range 2.1-12.0 mm) melanomas. While people with  
31 thinner melanomas were younger (60.5 vs 66.1 years), the groups were otherwise similar  
32 for socio-demographic factors. One quarter of the group reported a family history of  
33 melanoma, while eight participants reported previous skin cancer (melanoma 2, basal cell  
34 carcinoma (BCC) 6): we were only able to verify the two melanomas with histology reports.  
35 The thinner melanomas were all histologically reported as superficial spreading melanomas  
36 (SSM) and lentigo maligna melanomas (LMM) apart from one diagnosed as part SSM and  
37 part NM ('other'). Due to our sampling strategy there was a higher prevalence of nodular  
38 melanomas than in reported local figures. However, only a third of the thicker melanomas  
39 were nodular melanomas (NM, n=10), while a third were SSM (n=10), and the remaining  
40 third had 'other' diagnoses (LMM 2, acral 1, malignant blue naevus 1, unclassified 6). Of the  
41 nine participants diagnosed with melanoma on their back, seven were male, and three had  
42 thicker melanomas (NM 2, SSM 1).  
43  
44  
45  
46  
47  
48  
49

### 50 51 52 **Duration of skin changes**

53 Four participants (male 3, female 1) had their melanomas diagnosed opportunistically by a  
54 HCP (3 GPs, 1 oncologist); all these were thinner melanomas. The time to presentation (TTP)  
55  
56  
57



1  
2  
3 was between 1 week and 303 weeks (thinner: median TTP 21 weeks, range 1-303 weeks, 5  
4 longer than 52 weeks; thicker: median TTP 19 weeks, range 1-156 weeks, 7 longer than 52  
5 weeks). Most participants who presented with skin changes were referred after their first  
6 primary care consultation. The remainder were referred after their second consultation  
7 (n=11); none reported more than two consultations prior to referral. Comparisons between  
8 those with thinner (n=4) and thicker (n=7) melanomas who were referred after a second  
9 primary care consultation are presented in Table 5 and discussed later (see section on  
10 Healthcare providers and system factors).  
11  
12

13  
14 The main emerging themes within the appraisal and help-seeking intervals are discussed  
15 below. Throughout this section quotations are accompanied by information about gender  
16 (M, F), age, melanoma group (thinner or thicker), type of melanoma (SSM, NM, LMM,  
17 other), and symptom duration as time to presentation in weeks (including first and second  
18 presentations).  
19  
20  
21  
22  
23

## 24 **The appraisal interval**

25  
26 The 59 participants who detected their melanoma themselves described a variable and  
27 complex process of appraisal and re-appraisal of their skin, against their background  
28 knowledge of 'normal skin changes' and potential risk factors. We found no evidence of  
29 differences between people with thinner and thicker melanomas across any of these  
30 themes.  
31  
32  
33  
34

## 35 **Patient factors**

### 36 ***Explanations for skin changes***

37  
38 Awareness of a skin change, either a new lesion or a change in an existing lesion, did not  
39 usually cause any initial concern as it seemed so innocuous, and was often attributed to  
40 normal life changes such as pregnancy or aging.  
41  
42

43 *'I didn't recognise it as something that was different, because I've got quite a few moles on*  
44 *my skin so therefore I thought, "Has this been here before, or am I just imagining that I*  
45 *haven't seen it before?"' [F, 68, thinner, SSM, 52w]*

46  
47 *'Perhaps because I'd been pregnant and everything was darker anyway or you know, I didn't*  
48 *take any notice.'* [F, 36, thicker, NM, 17w]

49  
50 Other explanations were also often made, such as an insect bite or injury when the  
51 participant had been outside or in the garden.  
52

53 *'Since I'd been outside to a barbeque and I thought, oh well I've been bitten, it's just bitten*  
54 *there on the mole.'* [F, 54, thicker, SSM, 1w]

1  
2  
3 Skin changes were sometimes attributed to another skin condition (such as psoriasis) if it  
4 presented in a similar way; in these cases participants' previous experiences of a benign  
5 condition could influence their perception of the potential seriousness of the new skin  
6 changes.  
7  
8

### 9 10 11 **Prior beliefs about melanoma and its risk factors**

12  
13 Skin changes were appraised within the context of peoples' prior beliefs about melanoma  
14 and its risk factors, and their life experiences. Participants often used the terms skin cancer  
15 and melanoma interchangeably, and their prior awareness of melanoma varied widely.  
16 Whereas some participants noted that they had no awareness at all, others described  
17 gaining some knowledge about melanoma via TV programmes, magazines, the internet, and  
18 occasionally, health promotion material. A minority had heightened awareness through the  
19 melanoma experience of a family member or friend, or even a celebrity. A family history of  
20 melanoma or a personal previous melanoma led several people to have heightened risk  
21 perception and awareness and to quickly identify skin changes as a potential melanoma; all  
22 these people sought help rapidly and presented with thinner melanomas:  
23  
24

25  
26  
27 *'I wouldn't have known what they were talking about' [M, 62, thicker, SSM, 52w]*

28  
29 *'...because my mum has had a melanoma ten years ago so I've always been aware to keep a*  
30 *check on my moles.'* [F, 29, thinner, SSM, 3w]

31  
32 Many participants showed some understanding of the risk factors associated with  
33 melanoma and/or skin cancer when they discussed having lived in hot climates, or having  
34 suffered from sunburn, especially as a child. However, some were quite certain that they  
35 had never exposed themselves to the risk of UV damage:  
36

37  
38 *'I thought I had been careful about sitting out in the sun.'* [F, 57, thicker, NM, 36w]

39  
40 Prior knowledge or experience of melanoma and its risk factors did not appear to be related  
41 to educational levels, nor to melanoma thickness at diagnosis.  
42

### 43 44 **Do skin changes 'match' a melanoma?**

45  
46 While some participants admitted to prior knowledge of the symptoms and signs of a  
47 melanoma, such as 'jagged edges' or change in colour, only a few people had known that an  
48 itchy or bleeding mole was a 'bad' sign. Only two people noticed a match between their  
49 observed skin changes and their mental image of a melanoma, and this match appeared to  
50 prompt appropriate help-seeking, leading to shorter times to presentation.  
51  
52

53  
54 *'I don't know when I learnt it, but it was just in my subconscious that "ooh I need to go and,*  
55 *it's an itchy mole, that's not good".'* [M, 45, thicker, SSM, 4w/52w]

1  
2  
3 Strikingly, the majority of participants reported that their observed skin changes did not  
4 match their mental image (which had arisen from the melanoma experience of a family  
5 member or friend, from written and visual images, or from their knowledge of other  
6 cancers, see Table 2). When the changes did not match their mental images, people  
7 appeared more likely to 'normalise' their skin changes, or adopt other explanations, thus  
8 delaying help-seeking and diagnosis. Thus, the appraisal interval was often prolonged when  
9 there was a 'mismatch' between the mental image people had of melanoma and the way in  
10 which their own skin changes developed.  
11  
12  
13

### 14 15 16 17 **Disease factors: skin changes**

18 Most participants used rich and vivid lay vocabularies to describe their skin changes, for  
19 example, '*like a black fly squashed on a mirror*' [M, 48, thinner, SSM, 2w]. Table 3 shows  
20 descriptions of skin changes noticed by participants, displayed according to the items of the  
21 Glasgow seven-point checklist (7PCL) [25]. It also gives descriptions not commonly found on  
22 checklists. For instance, many people reported surprise at the small size of their melanoma,  
23 describing it as 'just a little spot'. Some also reported a 'spot on a mole', or that their skin  
24 change had been 'always there' or a 'new lesion'; a few reported their lesion as 'different to  
25 the others' (resonating with the Ugly Duckling sign [26]).  
26  
27  
28

29 Overall, Table 3 shows that both thinner and thicker melanomas can show any of the  
30 changes described in the 7PCL. However there is a suggestion of slightly different patterns.  
31 In particular, patients with thicker melanomas, both NMs and SSMs, described the so-called  
32 'minor features' of bleeding, oozing and itch more often. They also described both  
33 horizontal and vertical growth, again, irrespective of pathological type. Patients with  
34 thinner lesions discussed changes in shape more often. We were not able to find any  
35 differences in descriptions of skin changes between gender, age, educational level or  
36 geographical region.  
37  
38  
39  
40  
41  
42

### 43 44 45 46 47 48 49 50 51 52 53 54 55 56 57 **The help-seeking interval**

Reasons for waiting before seeking help included weighing up the priority of their skin  
change against other commitments. Many participants had been encouraged by other  
people to seek the advice of a HCP for their skin change. Emotions such as fear of a serious  
condition, cancer or treatment, were seldom mentioned and seemed to play little part in  
most peoples' decision-making, either to promote or delay help-seeking. More were  
concerned about going to see their GP with only minor symptoms, and wasting the GP's  
time.  
58  
59  
60

### **Patient factors**

### **Prioritisation choices**

Many participants discussed other responsibilities in their lives which felt more important than making an appointment to consult their GP about a skin change, and therefore contributed to delays in help-seeking. These competing priorities included employment, care of family members, moving house, holidays, and other health concerns.

*'In the cab game you can't organise things, you can't afford to be off your work' [M, 66, thicker, other, 156w]*

*'The six year old has got ADHD and mild autism and he's hard work, and I suppose [you're] concentrating on him most of your life like, and don't think about yourself...'* [M, 36, thicker, NM, 78w/3w]

*'I'd been very busy with selling a house, buying a house, all the rest of it, and of course I've patients as well to see' [F, 72, thinner, SSM, 8w]*

*'I had an ulcer on my leg, and redressing that, so I think I was more taken up with that getting healed...'* [F, 76, thicker, NM, 4w (Community nurse contacted GP)]

Some people mentioned repeatedly failing to make an appointment with a HCP either because of the competing responsibilities or because a skin change was 'not a priority':

*'I was supposed to have phoned up, but I forgot because it was busy at work and... it just skipped my memory' [M, 59, thinner, SSM, 1w]*

*'I didn't class it as an emergency...I didn't think it was important enough...'* [M, 64, thicker, other, 20w]

We found no differences in prioritisation choices between people with thinner and thicker melanomas.

### **Influence of other family members and the social network**

Many participants had been encouraged by other people to seek medical help, either by an observation about the skin change itself, or an encouragement to make an appointment with their GP, see Table 4. Some participants had not been aware of their skin change until it was noticed by another person; others had known, and were also often aware that it was continuing to change, but they were ultimately encouraged to seek help by others. The other people included family members, friends, work colleagues, and people providing treatments such as beauty therapists and hairdressers. The promotion of help-seeking, whether by family members or friends, did not appear to affect time to presentation overall, but may have acted as a trigger for many people. A few people were wrongly reassured by family members or friends that their skin change was not potentially serious. This appeared to delay timely help-seeking. There was no evident difference in the influence of family members between people diagnosed with thinner or thicker melanomas.

### Triggers for help-seeking

The main difference between participants with thinner and thicker melanomas was apparent with the 'triggers' that people described as they moved from the appraisal to help-seeking interval, when they realised that they 'had a reason to discuss their skin change with a HCP'- see Figure 1. While most people from both groups consulted family or their wider social network for endorsement to seek help about aspects of skin changes (changing colour, texture and size), some people with thinner melanomas also reported a heightened awareness of cancer from family experiences or the non-medical media, or noticing their skin changes as 'different to normal', while participants with thicker melanomas appeared to depend on prompts such as the more 'red flag' symptom of oozing/bleeding:

*'It was a black mole and most of my moles are dark or light brown so it was a different colour' [F, 29, thinner, SSM, 3w]*

*'I'd seen something on that Embarrassing Bodies programme, and they did a thing about moles and what was not right and so I suppose I saw that and that sort of made me think, maybe I should go and get it looked at.' [F, 54, thicker, SSM, 1w]*

*'It started to bleed, that was the point at which I went to the doctor 'cos I thought it shouldn't be bleeding' [F, 64, thicker, LMM, 104w]*

### Healthcare providers and system factors

Issues concerning healthcare providers and the NHS were only mentioned by a minority of participants. The first and most important area of concern involved a group of participants (n=11; thinner=4 (SSM 3, LMM 1); thicker=7 (SSM 2, NM 3, acral 1, blue malignant naevus 1) who reported that they had previously shown their lesion to a HCP, and had been reassured that they did not need further treatment, see Table 5. While some just made a passing reference to their first, reassuring encounter with their GP, others gave far more detailed descriptions. A first encounter often appeared to delay a second visit to the GP by providing 'false reassurance' about the lesion. Some mentioned that they had not been given advice (oral, written or a website) on how to best monitor their lesion and what changes should alert them to returning to their GP; this could potentially result in thicker lesions at diagnosis.

*'When people have told you that it's okay... I sort of took me eye off the ball really because I thought, well, they know better than I do.' [M, 75, thicker, SSM, 1w/17 w]*

Some people had problems with accessing their general practice for an appointment, and, for a few busy people, this problem was exacerbated by having competing priorities.

*'Trying to get an appointment with the GP here can just be horrific and because I'm out on the road.. I have to plan these things a couple of weeks ahead.' [F, 40, thinner, SSM, 3w]*

1  
2  
3 A few people with thicker melanomas also mentioned a dislike of seeing doctors, either in  
4 general practices or hospitals, so this might have delayed help-seeking.  
5

6 *'I'm just not a hospital person or a doctor person. If I'm really ill, I ken I'll have to go, but I*  
7 *have to be that way.'* [M, 52, thicker, SSM, 42w]  
8

9  
10 Patients' concerns about 'wasting their GP's time' are well known, but this concern  
11 appeared to be exacerbated by the small size of the skin changes, and the lack of pain or  
12 other features which could signify more serious conditions. Again, this concern appeared  
13 more prevalent among people with thicker than thinner melanomas.  
14

15 *'My decisions on going to the GP are always influenced to some extent by a knowledge of*  
16 *how busy they are and not wanting to waste their time.'* [F, 48, thicker, other, 4w/78w]  
17

18 *'I think most people that I know would be afraid of the doctor saying to himself or herself,*  
19 *you know, there's people just coming for nothing at all.'* [M, 93, thicker, LMM, 22w]  
20

21 A 56 year old woman diagnosed with a stage IIIA nodular melanoma on her lower leg  
22 described her pathway over six months as follows:  
23

24 Appraisal (10w): *'I've always had a mole on my leg.. it was there from birth.. it never*  
25 *bothered me because it was just flat and dark brown... It was possibly about six months ago I*  
26 *noticed it was just a little bit raised when it had always been flat.. as if like maybe something*  
27 *was stuck in there..'*  
28

29  
30 Help-seeking: *'I was due to have a smear and.. I asked the nurse to look at it.. and she said,*  
31 *"Oh no, there's nothing to worry about, that's... I can tell these things," so she just sort of put*  
32 *my mind at rest... I thought, "Well, she knows what she's talking about."*  
33

34 Re-appraisal- 16 weeks: *'It just started obviously getting bigger and bigger. What was the*  
35 *worst was every time I knocked it, it bled.. like a tick on you, because it was big and bulbous.'*  
36

37 Help-seeking: *'I realised it was getting bigger and my friend and I had talked about it and [I*  
38 *returned to the surgery] .. it was a different nurse more senior, I have known her for years..*  
39 *she sort of panicked me ..saying.. I need to get that looked at straight away.'*  
40  
41  
42  
43  
44  
45

## 46 DISCUSSION

### 47 Main findings

48  
49 This is the first study of detailed patient descriptions of their symptom experience and  
50 pathways to diagnosis of thinner and thicker melanomas in the UK. Addressing the policy  
51 agenda to diagnose melanoma earlier, the findings provide a number of novel insights  
52 **suggesting** where future interventions may be targeted. The key finding is that there appear  
53 to be subtly different patterns of symptoms experienced by those with thicker and thinner  
54 melanomas. In particular, descriptions of vertical growth, bleeding, oozing and itch were  
55  
56  
57  
58  
59  
60

1  
2  
3 features of thicker melanomas irrespective of pathological type. Furthermore, they did not  
4 appear to occur subsequent to changes in size, shape and colour, nor just be due to location  
5 on the body, for example, not all thicker lesions were nodular melanomas on the backs of  
6 older men. There was no clear distinction between time to presentation and melanoma  
7 thickness. It also does not appear that those with thicker melanomas have different  
8 cognitive, emotional or behavioural responses to skin changes compared to those with  
9 thinner melanomas, or have different pathways to or through the healthcare system. Whilst  
10 help-seeking was often postponed because of other life concerns, most decisions to seek  
11 help were triggered by common factors such as advice from family and friends.

12  
13 We also found a mismatch between the textual information and published images currently  
14 available, and the skin changes that were noticed by our participants. This provides  
15 opportunities to incorporate more appropriate lay vocabulary and photographic images into  
16 targeted community NHS and charity-run awareness campaigns such as 'Be Clear on Cancer'  
17 and 'Detect Cancer Early' [27]. A small but important minority of participants did not have  
18 their developing melanomas recognised during their first primary care consultation, and  
19 were not provided with enough information about on-going assessment of further skin  
20 changes or when to return to their clinician. These 'safety-netting' opportunities could be  
21 improved by more systematic approaches by GPs.

### 22 23 24 25 26 27 28 29 30 31 **Strengths and weaknesses**

32 Our methodological approaches have a number of strengths. We do not know of any other  
33 studies worldwide which have compared the patient experience across the appraisal and  
34 help-seeking intervals between people with thinner and thicker melanomas. We recruited  
35 participants systematically from dermatology clinics in two contrasting regions over 12  
36 months, and interviewed all the consenting patients diagnosed with the much less common  
37 melanomas  $\geq 2\text{mm}$  thickness with a poorer prognosis. The thicker melanoma group included  
38 equal numbers of NMs, SSMs, and other rare and unclassified types although no amelanotic  
39 lesions; the diversity of types in this group suggest that the differences identified between  
40 the thinner and thicker groups cannot simply be considered due to the biological differences  
41 between SSMs and NMs. Furthermore, using semi-structured interviews soon after  
42 diagnosis reduced recall bias, and allowed participants to speak freely about the period  
43 leading up to their diagnosis.

44  
45 We used novel and rigorous approaches to data collection, with the Model of Pathways to  
46 Treatment to underpin the interview schedule, and four different data collection methods  
47 including the use of patient drawings. Asking people to draw their skin changes and  
48 developing melanomas was of value to a number of participants, allowing them to describe  
49 subtle changes in more detail, and also to corroborate the accuracy of their recall of timing  
50 and events. Calendar-landmarking was also of value to a large minority of participants, who

1  
2  
3 were able to refine their recall of events and time intervals along their time to presentation  
4 [28]. Data saturation was reached before the total sample had been interviewed, suggesting  
5 that our findings are robust and representative of people diagnosed with melanoma in  
6 these regions of England and Scotland. As recommended in a 2006 review of symptom  
7 interpretation as a source of delay in melanoma presentation [29], we increased the rigour  
8 of our research by applying a theoretical approach (the Pathways to Treatment model,  
9 [17,18]) to frame our data collection and analysis. We conducted and reported this study  
10 according to the Aarhus statement guidelines on early cancer diagnosis research [23].

11  
12  
13  
14 The main weakness is that the interviews are necessarily retrospective and subject to recall  
15 and framing bias. As a result, the accounts cannot be regarded as an exact description of  
16 what happened. Instead, they are narratives that allowed people to describe their  
17 experiences and reflect a post-hoc rationalisation of events framed by their subsequent  
18 encounters with HCPs and increased knowledge since the diagnosis. Although we recruited  
19 all patients with thicker melanomas compared with purposive recruitment for thinner  
20 melanomas we believe the groups were similar as the latter group were matched for  
21 gender, age, geographic location and season. Furthermore, people from these two UK  
22 regions may have different beliefs and experiences of the pathway to melanoma diagnosis  
23 from people in other UK regions, and patients who did not agree to take part in the study  
24 may have affected the representativeness of the sample.  
25  
26  
27  
28  
29  
30  
31

### 32 **Comparison with existing literature**

33  
34 While there is a paucity of qualitative studies undertaken with people soon after their  
35 melanoma diagnosis, our findings resonate with a grounded theory study undertaken in  
36 northern England that explored the meaning to people treated for melanoma of shorter and  
37 longer time-lapses between detecting signs and receiving treatment [30], and those from an  
38 interview study about factors influencing presentation in primary care, undertaken with  
39 patients with suspicious pigmented lesions (only 4/40 interviewees were later diagnosed  
40 with melanoma) [15]. A French questionnaire study set among 590 people with melanomas  
41 also showed that relatives were involved in the detection of half of the melanomas, with  
42 median delays of 4 months before the patient realized they had a suspicious lesion, and  
43 further median delays of 2 months before this lesion was seen by a doctor [31]. Other  
44 evidence around time to diagnosis, but not comparing thinner and thicker melanomas,  
45 comes mainly from retrospective review of medical records or dermatologist experience,  
46 and suggests similar times to presentation and diagnosis [32].  
47  
48  
49  
50  
51  
52  
53

### 54 **Implications for clinicians and policymakers**





1  
2  
3 be more related to tumour biology than differences in symptom appraisal and help-seeking,  
4 these interesting differences need further exploration with bigger and more diverse  
5 populations and quantitative as well as qualitative study designs.  
6  
7

8 Alternative approaches to raising symptom awareness and supporting monitoring of skin  
9 changes to prompt earlier help seeking may be needed. There is a growing interest in the  
10 application of smartphone technology as one such approach but concerns remain around  
11 their safety and utility, and is clearly an area for further research [37].  
12  
13

14  
15  
16  
17  
18  
19  
20  
21  
22  
23  
24  
25  
26  
27  
28  
29  
30  
31  
32  
33  
34  
35  
36  
37  
38  
39  
40  
41  
42  
43  
44  
45  
46  
47  
48  
49  
50  
51  
52  
53  
54  
55  
56  
57  
58  
59  
60

For peer review only

## ACKNOWLEDGEMENTS

We particularly thank all the patients who kindly gave up their time and shared their personal accounts with us. We also thank Vicky McMorrnan and Sheena Dryden, melanoma/skin cancer nurse specialists at Cambridge University Hospitals NHS Foundation Trust and the Edinburgh Royal Infirmary NHS Lothian respectively, for their enthusiastic help with recruitment. We are also grateful to our two patients who gave us insights and feedback throughout the study, to Anna Barford for her early contribution to study set-up and data collection, to James Brimicombe for advice on data management and for developing the research database, and to Mr Per Hall for his support and encouragement throughout the study and comments on the final manuscript.

## Contributors

This study arose from collaboration between members of the National Cancer Research Institute (NCRI) Primary Care and Melanoma Clinical Studies Groups. FW, CC, RM, SS and DW were involved in the design of the study. LB and DC performed all the interviews and led the analysis, contributing to the core study team together with FW, SS and CC. FW wrote the first draft of the manuscript; all authors reviewed and edited the manuscript.

## Funding

Thanks to our funding organisation the National Awareness and Early Diagnosis Initiative (NAEDI), and to their funding partners: Cancer Research UK; Department of Health, England; Economic and Social Research Council; Health and Social Care Research and Development Division; Public Health Agency, Northern Ireland, National Institute for Social Care and Health Research, Wales and the Scottish Government. All researchers were independent of the funding body and the study sponsors and funder had no role in study design; data collection, analysis and interpretation of data; in the writing of the report; or decision to submit the article for publication.

FW was supported by an NIHR Clinical Lectureship followed by a NIHR Clinician Scientist award at the time of this study. The views expressed in this publication are those of the author(s) and not necessarily those of the NHS, the National Institute for Health Research or the Department of Health.

## Ethics and governance approvals

The study obtained ethical approval from the Cambridgeshire 4 Research Ethics Committee (11/EE/0076). Patients gave informed written consent for participation. The study was CKCRN approved (ID number 10310), and obtained NHS governance approvals from Cambridge University Hospitals NHS Foundation Trust's Research & Development Department, and NHS Lothian (Lothian R&D Project No: 2011/R/DER/04).

## Data sharing

1  
2  
3 No additional data available  
4

5 **Competing Interests**  
6

7 All authors have completed the Unified Competing Interest form at  
8 [www.icmje.org/coi\\_disclosure.pdf](http://www.icmje.org/coi_disclosure.pdf) (available on request from the corresponding author) and declare  
9 that (1) they have no support from or relationships with companies that might have an interest in  
10 the submitted work in the previous 3 years; (2) their spouses, partners, or children have no financial  
11 relationships that may be relevant to the submitted work; and (3) they have no non-financial  
12 interests that may be relevant to the submitted work.  
13  
14

15  
16 The corresponding author has the right to grant on behalf of all authors and does grant on behalf of  
17 all authors, an exclusive licence on a worldwide basis to the BMJ Publishing Group Ltd and its  
18 Licensees to permit this article (if accepted) to be published in BMJ editions and any other BMJPG  
19 products and sublicences to exploit all subsidiary rights, as set out in our licence  
20 (<http://resources.bmj.com/bmj/authors/checklists-forms/licence-for-publication>).  
21  
22

23  
24 All authors had full access to all of the data in the study and can take responsibility for the integrity  
25 of the data and the accuracy of the data analysis  
26  
27

28  
29 The corresponding author affirms that the manuscript is an honest, accurate, and transparent  
30 account of the study being reported; that no important aspects of the study have been omitted; and  
31 that any discrepancies from the study as planned (and, if relevant, registered) have been explained.  
32  
33  
34  
35  
36  
37  
38  
39  
40  
41  
42  
43  
44  
45  
46  
47  
48  
49  
50  
51  
52  
53  
54  
55  
56  
57  
58  
59  
60

## REFERENCES

1. Abdel-Rahman M, Stockton D, Rchet B, et al. What if cancer survival in Britain were the same as in Europe: how many deaths are avoidable? *Br J Cancer* 2009;**101 Suppl 2**:S115-24 doi: 10.1038/sj.bjc.6605401.
2. Cancer Research UK.  
<http://www.cancerresearchuk.org/cancerinfo/cancerstats/types/skin/survival/#stage> (last accessed 8 June 2014).
3. de Vries E, Coebergh JW. Cutaneous malignant melanoma in Europe. *Eur J Cancer* 2004;**40**(16): 2355-66.
4. Berrino F, De Angelis R, Sant M, et al. Survival for eight major cancers and all cancers combined for European adults diagnosed in 1995-99: results of the EURO CARE-4 study. *Lancet Oncol* 2007;**8**(9):773-83.
5. Jemal A, Devesa SS, Hartge P, et al. Recent trends in cutaneous melanoma incidence among whites in the United States. *J Natl Cancer Inst* 2001;**93**(9):678-83.
6. Garbe C, Leiter U. Melanoma epidemiology and trends. *Clin Dermatol* 2009;**27**(1):3-9.
7. Balch CM, Gershenwald JE, Soong SJ, et al. Final version of 2009 AJCC melanoma staging and classification. *J Clin Oncol* 2009;**27**(36):6199-206 doi: 10.1200/JCO.2009.23.4799.
8. Farasat S, Yu SS, Neel VA, et al. A new American Joint Committee on Cancer staging system for cutaneous squamous cell carcinoma: creation and rationale for inclusion of tumor (T) characteristics. *J Am Acad Dermatol* 2011;**64**(6):1051-9 doi: 10.1016/j.jaad.2010.08.033.
9. Martorell-Calatayud A, Nagore E, Botella-Estrada R, et al. Defining fast-growing melanomas: reappraisal of epidemiological, clinical, and histological features. *Melanoma Res* 2011;**21**(2):131-8 doi: 10.1097/CMR.0b013e328342f312.
10. Lyratzopoulos G, Abel GA, McPhail S, et al. Measures of promptness of cancer diagnosis in primary care: secondary analysis of national audit data on patients with 18 common and rarer cancers. *Br J Cancer* 2013;**108**(3):686-90 doi: 10.1038/bjc.2013.1.
11. Baughan P, O'Neill B, Fletcher E. Auditing the diagnosis of cancer in primary care: the experience in Scotland. *Br J Cancer* 2009;**101 Suppl 2**:S87-91 doi: 10.1038/sj.bjc.6605397.
12. Keeble S, Abel GA, Saunders CL, et al. Variation in promptness of presentation among 10,297 patients subsequently diagnosed with one of 18 cancers: Evidence from a national audit of cancer diagnosis in primary care. *Int J Cancer* 2014 doi: 10.1002/ijc.28763.

13. Austoker J, Bankhead C, Forbes LJ, et al. Interventions to promote cancer awareness and early presentation: systematic review. *Br J Cancer* 2009;**101 Suppl 2**:S31-9 doi: 10.1038/sj.bjc.6605388.
14. Branstrom R, Hedblad MA, Krakau I, et al. Reasons to seek medical attention for a skin check-up: the layman's perspective. *Eur J Public Health* 2003;**13**(4):294-8.
15. Walter FM, Humphrys E, Tso S, et al. Patient understanding of moles and skin cancer, and factors influencing presentation in primary care: a qualitative study. *BMC Fam Pract* 2010;**11**:62 doi: 10.1186/1471-2296-11-62.
16. Emery JD, Walter FM, Gray V, et al. Diagnosing cancer in the bush: a mixed-methods study of symptom appraisal and help-seeking behaviour in people with cancer from rural Western Australia. *Fam Pract* 2013;**30**(3):294-301 doi: 10.1093/fampra/cms087.
17. Walter FM, Webster A, Scott S, et al. The Andersen Model of Total Patient Delay: a systematic review of its application in cancer diagnosis. *J Health Serv Res Policy* 2012;**17**(2):110-8 doi: 10.1258/jhsrp.2011.010113.
18. Scott SE, Walter FM, Webster A, et al. The model of pathways to treatment: conceptualization and integration with existing theory. *Br J Health Psychol* 2013;**18**(1):45-65 doi: 10.1111/j.2044-8287.2012.02077.x.
19. Glasner T, van der Vaart W. Applications of calendar instruments in social surveys: a review. *Qual Quant* 2009;**43**(3):333-49 doi: 10.1007/s11135-007-9129-8.
20. Scott SE, Birt L, Carvers D, et al. Patient's drawings of their melanoma: A novel approach to understanding patients' symptom perception prior to healthcare consultation. In submission.
21. Fitzpatrick TB, Sober AJ. Sunlight and skin cancer. *N Engl J Med* 1985;**313**(13):818-20 doi: 10.1056/NEJM198509263131310.
22. Gale NK, Heath G, Cameron E, et al. Using the framework method for the analysis of qualitative data in multi-disciplinary health research. *BMC Med Res Methodol* 2013;**13**:117 doi: 10.1186/1471-2288-13-117.
23. Weller D, Vedsted P, Rubin G, et al. The Aarhus statement: improving design and reporting of studies on early cancer diagnosis. *Br J Cancer* 2012;**106**(7):1262-7 doi: 10.1038/bjc.2012.68.
24. Hansen RP, Vedsted P, Sokolowski I, et al. Time intervals from first symptom to treatment of cancer: a cohort study of 2,212 newly diagnosed cancer patients. *BMC Health Serv Res* 2011;**11**:284 doi: 10.1186/1472-6963-11-284.
25. Mackie RM, Doherty VR. Seven-point checklist for melanoma. *Clin Exp Dermat* 1991;**16**(2):151-3.

- 1
- 2
- 3
- 4 26. Grob JJ, Bonerandi JJ. The 'ugly duckling' sign: identification of the common characteristics of
- 5 naevi in an individual as a basis for melanoma screening. Arch Dermatol 1998;134(1):103-
- 6 104.
- 7
- 8 27. Cancer research UK. About Be Clear on Cancer 2013. Available from:
- 9 [http://www.cancerresearchuk.org/cancerinfo/spotcancerearly/naedi/beclearoncancer/back](http://www.cancerresearchuk.org/cancerinfo/spotcancerearly/naedi/beclearoncancer/background)
- 10 [ground](http://www.cancerresearchuk.org/cancerinfo/spotcancerearly/naedi/beclearoncancer/background) (accessed 8 June 2014).
- 11
- 12 28. Mills K, Cheung C, Hall N, et al. Using calendar landmarking instruments may aid patient recall of
- 13 cancer symptom time intervals from onset to diagnosis. In submission.
- 14
- 15 29. Nyawata I, Topping A. Symptom interpretation as a source of delay in malignant melanoma
- 16 presentation - A literature review. Clinical Effectiveness in Nursing 2006;9:e68-e78.
- 17
- 18 30. Topping A, Nkosana-Nyawata I, Heyman B. 'I am not someone who gets skin cancer': risk, time
- 19 and malignant melanoma. Health, Risk and Society 2013;15(6-7):596-614.
- 20
- 21 31. Richard MA, Grob JJ, Avril MF, et al. Delays in diagnosis and melanoma prognosis (I): the role of
- 22 patients. Int J Cancer 2000;89(3):271-79.
- 23
- 24 32. Baade PD, English DR, Youl PH, et al. The relationship between melanoma thickness and time to
- 25 diagnosis in a large population-based study. Arch Dermatol 2006;142(11):1422-27.
- 26
- 27 33. Simon AE, Waller J, Robb K, et al. Patient delay in presentation of possible cancer symptoms: the
- 28 contribution of knowledge and attitudes in a population sample from the United Kingdom.
- 29 Cancer Epidemiol Biomarkers Prev 2010;19(9):2272-7 doi: 10.1158/1055-9965.EPI-10-0219.
- 30
- 31 34. Forbes LJ, Simon AE, Warburton F, et al. Differences in cancer awareness and beliefs between
- 32 Australia, Canada, Denmark, Norway, Sweden and the UK: do they contribute to differences
- 33 in cancer survival? Br J Cancer 2013;108(2):292-300 doi: 10.1038/bjc.2012.542.
- 34
- 35 35. Aldridge RB, Zanotto M, Ballerini L, et al. Novice identification of melanoma: not quite as
- 36 straightforward as the ABCDs. Acta Dermato-Venereologica 2011;91(2):125-30 doi:
- 37 10.2340/00015555-1070.
- 38
- 39 36. Mitchell E, Rubin G, Macleod U. Improving diagnosis of cancer- a toolkit for General Practice,
- 40 Royal College of General Practitioners, 2012.
- 41
- 42 37. Tyagi A, Miller K, Cockburn M. e-Health Tools for Targeting and Improving Melanoma Screening:
- 43 A Review. Journal of Skin Cancer 2012;2012:437502 doi: 10.1155/2012/437502.
- 44
- 45 38. Mackie R. *Malignant Melanoma. A Guide to Early Diagnosis*: Glasgow University Department of
- 46 Dermatology, 1989.
- 47
- 48
- 49
- 50
- 51
- 52
- 53
- 54
- 55
- 56
- 57
- 58
- 59
- 60

**Table 1. Characteristics of study participants (n=63), and clinical characteristics of their melanomas, comparing thinner (n=33) and thicker (n=30) melanomas.**

|                                                             | Thinner melanomas<br>( $<1$ mm Breslow thickness) | Thicker melanomas<br>( $>2$ mm Breslow thickness) |
|-------------------------------------------------------------|---------------------------------------------------|---------------------------------------------------|
| <b>Age at interview</b>                                     |                                                   |                                                   |
| Mean age $\pm$ s.d. (range)                                 | 60.5 $\pm$ 14.6 (29 – 85)                         | 66.1 $\pm$ 15.5 (36 – 93)                         |
| Less than 60 years (n=23)                                   | 14 (61%)                                          | 9 (39%)                                           |
| 60 years and over (n=40)                                    | 19 (47%)                                          | 21 (53%)                                          |
| <b>Gender</b>                                               |                                                   |                                                   |
| Male                                                        | 14 (42%)                                          | 17 (58%)                                          |
| Female                                                      | 19 (58%)                                          | 13 (42%)                                          |
| <b>Education</b>                                            |                                                   |                                                   |
| No further education                                        | 21 (64%)                                          | 21 (70%)                                          |
| Further education                                           | 12 (36%)                                          | 9 (30%)                                           |
| <b>Fitzpatrick scale: skin colour <sup>a</sup></b>          |                                                   |                                                   |
| Type I (white skin, v fair)                                 | 7 (21%)                                           | 2 (6%)                                            |
| Type II (white skin, fair)                                  | 6 (18%)                                           | 11 (37%)                                          |
| Type III (creamy white, any hair)                           | 17 (52%)                                          | 16 (53%)                                          |
| Type IV (brown, Mediterranean)                              | 3 (9%)                                            | 1 (3%)                                            |
| <b>Fitzpatrick scale: skin reaction to sun <sup>a</sup></b> |                                                   |                                                   |
| Type I (always burns, never tans)                           | 4 (12%)                                           | 3 (10%)                                           |
| Type II (usually burns, tans with difficulty)               | 11 (33%)                                          | 10 (33%)                                          |
| Type III (sometimes mild burn, gradually tans)              | 10 (30%)                                          | 11 (37%)                                          |
| Type IV (rarely burns, tans easily)                         | 6 (18%)                                           | 6 (20%)                                           |
| Type V (very rarely burns, tans very easily)                | 2 (7%)                                            | 0                                                 |
| <b>Melanoma location</b>                                    |                                                   |                                                   |
| Head & neck                                                 | 6 (18%)                                           | 9 (30%)                                           |
| Trunk <sup>b</sup>                                          | 9 (27%)                                           | 4 (14%)                                           |
| Upper limb                                                  | 10 (30%)                                          | 7 (23%)                                           |
| Lower limb                                                  | 8 (24%)                                           | 10 (33%)                                          |
| <b>Melanoma type</b>                                        |                                                   |                                                   |
| Superficial spreading melanoma (SSM)                        | 25 (76%)                                          | 10 (33%)                                          |



|                                |           |          |
|--------------------------------|-----------|----------|
| Nodular melanoma (NM)          | 0         | 10 (33%) |
| Lentigo maligna melanoma (LMM) | 7 (21%)   | 2 (7%)   |
| Others <sup>c</sup>            | 1 (3%)    | 8 (27%)  |
|                                |           |          |
| <b>Melanoma TMN stage</b>      |           |          |
| Stage I <sup>d</sup>           | 33 (100%) | 0        |
| Stage II <sup>e</sup>          | 0         | 23 (77%) |
| Stage III <sup>f</sup>         | 0         | 7 (23%)  |
| Stage IV                       | 0         | 0        |

<sup>a</sup> Self-reported, not verified in medical records.

<sup>b</sup> Includes melanomas on the back (thinner 6, 18%; thicker 3, 10%).

<sup>c</sup> Thinner: mixed type (SSM & NM) x 1; Thicker: LMM 2, acral 1, malignant blue naevus 1, unclassified 6.

<sup>d</sup> Stage IA = 27, stage IB = 6 (**T1-2a, N0, M0**).

<sup>e</sup> Stage IIA = 11, stage IIB = 5, Stage IIC = 7 (**T2b-4b, N0, M0**).

<sup>f</sup> Stage IIIA = 6, stage IIIB = 1 (**T1a – 4a, N1a-2c, M0**).

**Table 2. Illustrative quotations of a ‘mis-match’ between observed skin changes and ‘mental images’ of a melanoma**

|                                                                                                                                                                                                                                                                                                                                                                                                                                                                                                                                                                                                                                                                                                                                                                                                                                                                                                                                                                                                                                                                                                                                                                                                                                                                                                                                                                                           |
|-------------------------------------------------------------------------------------------------------------------------------------------------------------------------------------------------------------------------------------------------------------------------------------------------------------------------------------------------------------------------------------------------------------------------------------------------------------------------------------------------------------------------------------------------------------------------------------------------------------------------------------------------------------------------------------------------------------------------------------------------------------------------------------------------------------------------------------------------------------------------------------------------------------------------------------------------------------------------------------------------------------------------------------------------------------------------------------------------------------------------------------------------------------------------------------------------------------------------------------------------------------------------------------------------------------------------------------------------------------------------------------------|
| <p><b>Comparison with experience of a family member’s melanoma</b></p> <p>‘My mother in law had skin cancer on her back, so I expected melanoma to be much bigger: my little mole was nothing.’ [F, 53, thinner, SSM, 14w/52w]</p>                                                                                                                                                                                                                                                                                                                                                                                                                                                                                                                                                                                                                                                                                                                                                                                                                                                                                                                                                                                                                                                                                                                                                        |
| <p><b>Comparison with information</b></p> <p>‘I suppose from the descriptions that I’ve read about melanomas.. it didn’t ring any alarm bells... Okay, it has to start somewhere but, as it developed, [I expected] it would become more raised, it would be scaly and rough, it would be more inflamed-looking. But because this just remained completely flat on the skin...it didn’t meet any profile that I was expecting.’ [F, 63, thinner, LMM, 104w]</p> <p>‘It’s not like a mole, you can see a mole changing colour or shape or texture, you can read all about that, but as my wife says, nothing in the leaflets says anything about under the nail.’ [M, 60, thicker, other, 1w]</p> <p>‘..Because melanomas, he says, are black. Now, this growth on my knee, it was just like a warty growth, with a scarlet top on it, and.. there was no discolouration in it at all. ...I think that’s maybe how a lot of folk’ll not think of these things, because it doesn’t look like what you think it’s supposed to be, if you ken what I mean. It’s just like a bit of skin rising up.’ [M, 52, thicker, SSM, 42w]</p>                                                                                                                                                                                                                                                            |
| <p><b>Comparison with images</b></p> <p>‘I think that the way melanomas are publicised, this is what they look like, that’s really misleading ‘cos that isn’t what mine looked like until I saw it blown up on [the dermatologist]’s screen, and I thought ‘oh my God, yeah, mine does look like one of the ones on the front of the leaflet’ but... it just looks very neat, symmetrical, you know, sharp edges.’ [F, 39, thinner, other, 78w]</p> <p>‘When you go to the hospital and you see the things on the walls, and on the internet, and you see the diagrams of it, that is to me what malignant melanoma looks like. Mine didn’t look... it just didn’t come into the category of melanoma, it hadn’t [gone] funny shaped, it hadn’t been jaggy, it didn’t go dark, it didn’t get bigger...it just wasn’t what I imagined melanoma to look like. I think of [melanoma] getting bigger, crustier, bleeding ... and this was... dead flat... none of the things that were there at the back of my mind actually rang any alarm bells.’ [F, 58, thinner, SSM, 22w]</p> <p>‘It didn’t look like a melanoma. Even the booklet I’ve got given since... four or six pictures in there of actually different ones and it didn’t look like one of them. ... Even like the doctor said “I’ve noticed it on there before but I didn’t take any notice”.’ [M, 36, thicker, NM, 78w/3w]</p> |
| <p><b>Comparison with knowledge of other cancers</b></p> <p>‘I think if I could feel pain and know what it was, I may be more responsive to getting it treated’ [M, 74, thinner, LMM, 303w]</p>                                                                                                                                                                                                                                                                                                                                                                                                                                                                                                                                                                                                                                                                                                                                                                                                                                                                                                                                                                                                                                                                                                                                                                                           |

Table 3. Descriptions of skin changes, using the Glasgow seven-point checklist (7PCL) criteria [38] and other descriptions (Dis-confirming reports in pink)

| Feature<br>- Subgroups                         | Way feature was described                                                                                                                      |                                                                                                                               | Thinner                                                    |            |              | Thicker    |             |                        |
|------------------------------------------------|------------------------------------------------------------------------------------------------------------------------------------------------|-------------------------------------------------------------------------------------------------------------------------------|------------------------------------------------------------|------------|--------------|------------|-------------|------------------------|
|                                                | Thinner                                                                                                                                        | Thicker                                                                                                                       | SSM<br>n=25                                                | LMM<br>n=7 | Other<br>n=1 | NM<br>n=10 | SSM<br>n=10 | LMM/<br>Others<br>n=10 |
| <b>1 7PCL criteria</b>                         |                                                                                                                                                |                                                                                                                               |                                                            |            |              |            |             |                        |
| <b>1.1. Changing size</b><br>i Cover more skin | <i>'it had grown, it looked bigger'</i><br>[M,48,SSM,2w]                                                                                       | <i>'getting bigger, but not ultra-big, no-one noticed'</i> [M,66, other,136w]                                                 | ●                                                          | ●          | ●            | ●          | ●           | ●                      |
|                                                | <i>'dark brown part was .. more raised'</i><br>[F,40,SSM,3w]                                                                                   | <i>'vertical before it curved across at the top'</i><br>[M,45,SSM,4w/52w], <i>'mushroomed out... bubbled up'</i> [M,78,NM,8w] | ●                                                          |            |              | ●          | ●           | ●                      |
|                                                | No changing size- flat to skin                                                                                                                 |                                                                                                                               | ●                                                          |            |              |            |             |                        |
| <b>1.2. Changing and/or irregular shape</b>    | <i>'it sort of made.. a pinky horseshoe'</i><br>[F,53,SSM,14w/52w], <i>'maple-leaf raggedy'</i><br>[F,63, LMM,104w]                            | <i>'breaking into several bits'</i><br>[F,48,other,4w/78w]                                                                    | ●                                                          | ●          | ●            |            | ●           | ●                      |
|                                                | No changing shape- smooth edge                                                                                                                 |                                                                                                                               | ●                                                          |            |              |            |             |                        |
| <b>1.3. Changing and/or irregular colour</b>   | <i>'two colours, dark with a lighter section'</i><br>[M,37,SSM,52w], <i>'slight discolour that got darker, black like oil'</i> [M,67,SSM,208w] | <i>'red then turned black, lively-looking'</i><br>[M,73,other,104w], <i>'several different colours'</i> [M,82,other,3w]       | ●                                                          | ●          | ●            | ●          | ●           | ●                      |
|                                                | No changing colour (not always darker)                                                                                                         |                                                                                                                               | ●                                                          |            |              | ●          | ●           | ●                      |
| <b>1.4. Oozing</b><br>i Bleeding               | <i>'a new shaving blade would nick it but didn't bleed on its own'</i> [M,74,LMM,303w]                                                         | <i>'noticed blood on the pillow'</i><br>[M,66,NM,78w], <i>'forever bleeding and getting a scab'</i> [M,86,SSM,52w]            | ●                                                          | ●          |              | ●          | ●           | ●                      |
|                                                | ii Discharge                                                                                                                                   | -                                                                                                                             |                                                            |            |              | ●          | ●           | ●                      |
| <b>1.5. Changing sensation</b><br>i Itch       | <i>'when it felt itchy and I peeled like flaked off bits of it'</i> [M,67,SSM,208w]                                                            | <i>'it was within a mole, just the smallest pimple, a red itchy spot'</i> [M,45,SSM,4w/52w]                                   | ●                                                          |            |              | ●          | ●           | ●                      |
|                                                | ii Soreness                                                                                                                                    | <i>'when caught my nail on it a little bit sore'</i><br>[F,40,SSM,3w]                                                         | <i>'painful sort of like a wasp sting'</i><br>[M,60,NM,1w] | ●          |              |            | ●           | ●                      |
| <b>1.6. Inflammation</b><br>i Texture change   | <i>'quite bumpy'</i> [M,63,SSM,2w/104w]                                                                                                        | <i>'bubbled up'</i> [M,78,NM,8w]                                                                                              | ●                                                          |            |              | ●          | ●           | ●                      |
|                                                | ii Crusty, flaky                                                                                                                               | <i>'it was very dry, a bit scaly'</i> [F,37,SSM,8w]                                                                           | <i>'dark leathery, I tried to keep it moisturised'</i>     | ●          | ●            |            | ●           | ●                      |

|                                                                |                                                                                                                               |                                                                                                                                                  |   |   |   |   |   |   |
|----------------------------------------------------------------|-------------------------------------------------------------------------------------------------------------------------------|--------------------------------------------------------------------------------------------------------------------------------------------------|---|---|---|---|---|---|
|                                                                |                                                                                                                               | [F,48,other,4w/78w]                                                                                                                              |   |   |   |   |   |   |
| <b>1.7 Large size</b>                                          | 'larger than a mole, about the size of a one penny piece' [F,66,LMM,20w/78w]<br>'size of a thumb nail' [F,63,LMM,104w]        | 'it was like a 2p piece' [M,82,other,3w]<br>'felt this huge lump' [M,40,other,4w/68w]                                                            | • | • |   | • | • | • |
| <b>2 Other descriptions</b>                                    |                                                                                                                               |                                                                                                                                                  |   |   |   |   |   |   |
| <b>2.1 'Different'</b>                                         | 'look very different from all the others' [M,63,SSM,2w/104w]<br>'not like the rest of my moles' [F,37,SSM,8w]                 | 'quite a big mole, nothing wrong until the spot on top' [F,54,SSM,1w], 'two were different, more livelier than the other ones' [M,73,other,104w] | • |   |   |   |   | • |
| <b>2.2 Small size</b><br>i Tiny/small mole<br>li 'just a spot' | 'tiny, wee circular mole' [F,43,LMM,22w]<br>'a little black spot, just an aging spot' [F,76,LMM,16w]                          | 'it was so minuscule' [M,93,LMM,22w]<br>'it was nothing like a mole at all, it was just like a spot' [M,64,other,20w]                            | • | • |   | • | • | • |
| <b>2.3 New lesion</b>                                          | 'somebody else has noticed it so it must be a new one' [F,43,LMM,22w]'the mole had appeared, it was a new mole' [F,29,SSM,3w] | 'just suddenly appeared' [F,57,NM,36w]<br>'came very quick; it wasn't there and then it was there' [F,76,SSM,4w]                                 | • | • |   | • | • | • |
| <b>2.4 'Always there'</b>                                      | 'had been there for literally years' [M,74,SSM,14w], 'a birthmark, heart shaped, an old friend' [F,39,other,78w]              | 'been there from birth' [F,56,NM,10w/16w]<br>'always had that mole, it didn't bother me' [F,61,SSM,26w]                                          | • | • | • | • | • | • |

Reported feature per group: • = 1-25%; • = 25-50%; • = 50-75%; • = 75-100%

**Table 4. Illustrative quotations of the influences of comments from extended family and friends**

**Noticing a skin change**

'My partner's daughter says to me "Have you always had that mole on your ear?" So I thought well somebody else has noticed it so it must be a new one.' [F, 43, thinner, LMM, 22w]

'I saw my sisters at the funeral and they both mentioned it; we hadn't noticed it.' [M, 66, thicker, NM, 78w]

**Acting on encouragement to seek help**

'It wasn't till my daughter-in-law come over from Australia, and she said to me that she thought I ought to have it checked out because obviously in Australia they're very conscious of it all.' [F, 58, thinner, SSM, 22w]

'The girl in the beauty salon... she always asked me about this one... and then I went again and she said, "have you seen a doctor?", I said, "no, I don't because it's nothing, I feel okay", and she said, "no, please, I will make you a cup of tea, I will give you a phone number, please go this week." [F, 40, thinner, SSM, 156w]

'I was at a dinner with my daughter, and fortunately I had a low backed dress on, and one of her friends said, "I don't like the look of that mole on your back, and I suggest you have it checked out."' [F, 66, thicker, SSM, 4w]

'It dinnae change dramatically, so one day I quietly said to nurse friend, "Will you just have a look at this for me?" She just took one look and she says "You must promise me when you get home you will go and see the doctor." [F, 61, thicker, SSM, 26w]

**Advice of others having little effect**

'She thought it was getting darker at some stage, can't remember exactly when, but she maybe nagged me for a year or two before.' [M, 67, thinner, SSM, 208w]

'It's not as if I hadnae been told to go and see about it, because my daughter and my wife... they said, "Well you should go and see about that," but I never did, you know, until May.' [M, 64, thicker, other, 20w]

**Not encouraging help seeking**

'Fairly early on I discussed it with (a friend). ... But because she said, "I can't really feel it" I think I ignored it. It would have been better if she'd said to me, "I think you need to have it looked at." I think I'd have gone to the doctor then, but because she said, "No, I think it's fine" I think I left it. [F, 64, thicker, LMM, 104 w]

Table 5. Time from first detecting a skin change to first presentation, and first to second presentations to primary care, by time intervals (ordered by first TTP), gender, age, melanoma type and stage

|                          | Time from detecting a skin change to first presentation | Time from first presentation to second presentation | Gender & age | Type & stage |
|--------------------------|---------------------------------------------------------|-----------------------------------------------------|--------------|--------------|
| <b>Thinner melanomas</b> |                                                         |                                                     |              |              |
| 1                        | 2w                                                      | 104w                                                | M, 63        | SSM, IA      |
| 2                        | 4w                                                      | 22w                                                 | F, 58        | SSM, IA      |
| 3                        | 14w                                                     | 52w                                                 | F, 53        | SSM, IA      |
| 4                        | 20w                                                     | 78w                                                 | F, 66        | LMM, IA      |
| <b>Thicker melanomas</b> |                                                         |                                                     |              |              |
| 5                        | 1w                                                      | 17w                                                 | M, 75        | SSM, IIC     |
| 6                        | 3w                                                      | 1w                                                  | M, 73        | NM, IIB      |
| 7                        | 4w                                                      | 52w                                                 | M, 45        | SSM, IIA     |
| 8                        | 4w                                                      | 68w                                                 | M, 40        | Other, IIIA  |
| 9                        | 4w                                                      | 78w                                                 | F, 48        | Acral, IIIA  |
| 10                       | 10w                                                     | 16w                                                 | F, 56        | NM, IIIA     |
| 11                       | 78w                                                     | 3w                                                  | M, 36        | NM, IIA      |

1  
2  
3  
4  
5  
6  
7  
8  
9 **'This isn't what mine looked like': a qualitative study of symptom**  
10 **appraisal and help seeking in people recently diagnosed with**  
11 **melanoma**  
12  
13

14  
15  
16 Fiona M Walter<sup>1,2</sup>, Linda Birt<sup>1</sup>, Debbie Cavers<sup>3</sup>, Suzanne Scott<sup>4</sup>, Jon Emery<sup>2,1</sup>, Nigel Burrows<sup>5</sup>,  
17 Gina Cavanagh<sup>6</sup>, Rona MacKie<sup>7</sup>, David Weller<sup>3</sup>, Christine Campbell<sup>3</sup>  
18  
19

20  
21  
22  
23  
24  
25 <sup>1</sup> The Primary Care Unit, University of Cambridge CB1 8RN, UK

26 <sup>2</sup> University of Melbourne, Australia

27  
28 <sup>3</sup> University of Edinburgh, UK

29  
30 <sup>4</sup> Unit of Social & Behavioural Sciences, Kings College London Dental Institute, UK

31  
32 <sup>5</sup> Cambridge University Hospitals NHS Trust, Cambridge, UK

33  
34 <sup>6</sup> Royal Infirmary of Edinburgh, NHS Lothian, UK

35  
36 <sup>7</sup> University of Glasgow, UK  
37  
38  
39  
40  
41  
42

43 Correspondence to: Fiona M Walter [fmw22@medschl.cam.ac.uk](mailto:fmw22@medschl.cam.ac.uk)  
44  
45  
46  
47  
48  
49  
50  
51  
52  
53  
54  
55  
56  
57  
58  
59  
60

## ABSTRACT

### Objective

To explore symptom appraisal and help-seeking decisions among patients recently diagnosed with melanomas, and to compare experiences of people with 'thinner' (<1mm) and 'thicker' (>2mm) melanomas, as thickness at diagnosis is an important prognostic feature.

### Methods

In-depth interviews with patients within ten weeks of melanoma diagnosis explored the factors impacting on their pathways to diagnosis. Framework analysis, underpinned by the Model of Pathways to Treatment, was used to explore the data with particular focus on patients' beliefs and experiences, disease factors, and healthcare professional (HCP) influences.

### Results

63 patients were interviewed (29-93 years, 31 women, 30 thicker melanomas). All described their skin changes using rich lay vocabulary. Many included unassuming features such as 'just a little spot' as well as common features of changes in size, colour and shape. There appeared to be subtly different patterns of symptoms: descriptions of vertical growth, bleeding, oozing and itch were features of thicker melanomas irrespective of pathological type.

Appraisal was influenced by explanations such as normal life changes, prior beliefs, and whether skin changes matched known melanoma descriptions. Most decisions to seek help were triggered by common factors such as advice from family and friends. Eleven patients reported previous reassurance about their skin changes by a HCP, with little guidance on monitoring change or when it would be appropriate to re-consult.

### Conclusions

Patients diagnosed with both thinner and thicker melanomas often did not initially recognise or interpret their skin changes as warning signs or prompts to seek timely medical attention. The findings provide guidance for melanoma awareness campaigns on more appropriate images, helpful descriptive language, and the need to stress the often apparently innocuous nature of potentially serious skin changes. The importance of appropriate advice, monitoring and safety-netting procedures by HCPs for people presenting with skin changes is also highlighted.



**STRENGTHS AND LIMITATIONS OF THIS STUDY**

- This study is the first exploration of symptom appraisal and help-seeking among people diagnosed with 'thinner' melanomas (T1, very good prognosis, 5 year disease-free prospects 95%), compared with those with 'thicker' melanomas (T3 and T4, less good prognosis, 5 year disease-free prospects <55%).
- The study did not identify clear discriminating features in the diagnostic pathway, or features of thinner versus thicker melanomas.
- The findings highlight a mismatch between the information people need when assessing their skin changes and the information and images currently available, thus providing opportunities to incorporate more appropriate descriptive language, images and information into targeted community awareness campaigns as well as by the NHS and charities via their websites and promotional materials.
- A small but important minority of participants did not have their developing melanomas recognised during their first primary care consultation, and were not provided with enough information about on-going assessment of further skin changes or when to return to their clinician. These 'safety-netting' opportunities could be improved by more systematic approaches by HCPs.
- Using semi-structured interviews close to diagnosis allowed in-depth exploration of the participants' experiences and views, but the accounts are necessarily retrospective and subject to recall and framing bias.

## INTRODUCTION

Diagnosing melanoma earlier is high on the UK health policy agenda; it is estimated that around 190 deaths from melanoma could be avoided each year if survival rates in England matched the best in Europe [1]. Worldwide melanoma incidence rates are increasing faster than any other solid tumour. In the UK the incidence has quadrupled since the 1970s [2]; similar incidence rises have been reported across Europe [3,4], the USA [5] and Australia [6]. In the UK there were more than 2,209 deaths and 12,800 new cases diagnosed in 2011, with a disproportionately high rate among people aged less than fifty years [2]. The most important prognostic factor is the tumour thickness at diagnosis according to the Breslow scale (T classification) [7]. **Patients with a primary melanoma  $\leq 1\text{mm}$  at diagnosis (T1) currently have 5 year disease-free prospects of over 95%, while for tumours  $\geq 2\text{mm}$  at diagnosis this is lower, falling to  $<55\%$  with lymph node involvement but no metastatic spread [8].** Tumour thickness is also associated with rapid growth which occurs more frequently in elderly men [9].

Timely diagnosis can be influenced by the diagnostic skills of GPs. A recent analysis of the Cancer Patient Experiences Survey 2009 and the 2010 RCGP cancer audit data reported that more than 90% of people diagnosed with melanoma were seen by their GPs less than three times before diagnosis, compared with 60-80% for the majority of cancer types [10]. This suggests that most melanomas are recognised by GPs and appropriately referred to specialist care in England.

Timely diagnosis can also be influenced by people's symptom appraisal and help-seeking behaviour. Compared with other cancers, people with melanoma have among the longest time between first noticing a symptom and presenting to their GP [11,12], suggesting that the major opportunity to diagnose melanoma earlier is prompting earlier presentation to healthcare through signs and symptom awareness campaigns [13]. This requires an understanding of how people interpret changes in their moles or new lesions. We present findings from an in-depth interview study with UK patients recently diagnosed with 'thinner' (T1) compared with 'thicker' primary melanomas (T3 and T4), which aimed to explore the processes and experiences of symptom detection and help-seeking decisions leading to melanoma diagnosis.

## METHODS

### Design and ethics

Semi-structured face to face in-depth interviews were conducted with adults diagnosed with invasive cutaneous melanoma within the previous ten weeks. Ethics approval was obtained from the Cambridgeshire 4 Research Ethics Committee (11/EE/0076).

### Setting and recruitment

Potential participants were identified and recruited by the melanoma/skin cancer nurse specialists via the weekly multidisciplinary team meetings of dermatologists, plastic surgeons and oncologists at two regional hospitals: Cambridge University Hospitals NHS Foundation Trust in the East of England, and the Edinburgh Royal Infirmary, NHS Lothian, Scotland. These hospitals together serve a population of approximately 1.4 million, and the MDT meetings review more than 400 new cases of invasive cutaneous melanoma each year.

All adults aged 18 and over newly diagnosed with a primary invasive cutaneous melanoma (staged as  $\leq 1\text{mm}$  (T1, 'thinner') or  $\geq 2\text{mm}$  (T3 and T4, 'thicker') at the two participating hospitals were eligible for inclusion unless the melanoma/skin cancer nurse specialists felt that they were not suitable on clinical grounds (other severe physical or mental health conditions). Patients were mailed an invitation letter with a patient information sheet. As T3 and T4 melanomas are diagnosed at about 25% of the rate of T1 melanomas, we recruited all those with thicker melanomas who agreed to take part. At the same time we purposively sampled people with T1 melanomas by age, gender, location and season to ensure that we had a broad range of views and experiences, and we continued until saturation of data. **Reasons for not selecting patients for interview included: sampling decisions (n=34), lost to follow-up (n=6), and ill-health (n=1).**

### Data collection

Interviews were undertaken between January 2012 and January 2013. In each area an experienced researcher used a semi-structured approach, with an interview schedule informed from the literature [14,15], our collective expertise from interviewing patients recently diagnosed with other cancers [16], and a pilot study (n=17, **conducted during the early stages of the study, and including patients interviewed >10 weeks post-diagnosis (n=12), or with melanoma histology which did not fit the inclusion criteria (n=5, Breslow thickness 1-2mm or indeterminate)**). The theoretical approach of the Model of Pathways to Treatment [17,18] (Figure 1) was used to underpin the interview schedule, exploring the processes that occurred within each time-interval and focusing on: how initial symptoms were noticed; personal risk perceptions; the language used to describe symptoms and changes over time; the participant's decision-making and triggers to help-seeking; and the experience of the diagnostic process of primary and secondary care from the patient perspective. A calendar-landmarking technique [19] was used as an adjunct to the interviews, to establish the timing and details of events which led to the melanoma diagnosis, together with diaries and letters that participants referred to during this process. Participants were also invited make a pencil drawing/s of their skin cancer as it developed; on-going analyses are examining perceptions of lesions over time, and comparing the drawings with clinical images [20]. At the end of each interview, participants completed a short questionnaire to provide demographic data, and information about their skin and hair colour and their skin's response to UV light using the widely validated Fitzpatrick Scale [21].

1  
2  
3 Interviews were undertaken as soon as possible after diagnosis, with all interviews  
4 completed within 10 weeks of diagnosis, and the majority within 6 weeks. Interviews lasted  
5 between 40-65 minutes and were conducted primarily in the participant's home although  
6 two people chose to be interviewed in university offices. Patients were sometimes  
7 accompanied by a family member, usually spouse or daughter. Audio-recordings of  
8 interviews were professionally transcribed verbatim and anonymised.  
9  
10

### 11 12 13 **Analysis**

14 All interview transcripts were repeatedly read and re-read by the two researchers LB  
15 (nursing background) and DC (health services researcher), and the members of the 'core'  
16 analysis team also read the majority of the transcripts (FW, academic GP; SS, health  
17 psychologist; CC, primary care researcher). Analysis was an iterative process starting near  
18 the beginning of data collection and using the 17 pilot interviews to develop our analytic  
19 strategy. We used the approach of Framework analysis to create and establish meaningful  
20 patterns in five phases, namely: familiarization with the data, generating initial codes,  
21 inductively searching for themes among codes, index charting and mapping of data, before  
22 finally defining and naming themes [22]. The coding and data management were supported  
23 by NVivo software (QSR International, version 9). The Model of Pathways to Treatment  
24 (Figure 1) was also used to underpin the analysis with a theoretic model for the different  
25 intervals and processes that occur along the pathway to diagnosis and treatment, in order  
26 to accurately assess the time intervals, their content and context. The final themes were  
27 agreed through a series of meetings involving all five 'core' researchers, and a consensus  
28 meeting with the wider study team.  
29  
30  
31  
32  
33  
34

35 The analysis focused on the main themes within the time to presentation (TTP), defined as  
36 from the first detection of skin change to the first consultation with a healthcare  
37 professional [23, 24]. This interval comprises the appraisal and help-seeking intervals  
38 [17,18], and the analysis examined patient and healthcare factors as well as 'disease'  
39 factors, relating to the developing melanoma. When the first consultation did not result in a  
40 referral, we also included further iterative processes until the next consultation in the  
41 analyses. Participants with shorter intervals tended to use diaries and have good recall of  
42 the relevant dates. People with longer intervals tended to have vaguer recollections,  
43 particularly around the time they had first detected any skin change. While participants  
44 were often able to discuss triggers to help-seeking, they were less able to recall the precise  
45 dates of these triggers, and we therefore do not present the separate durations of the  
46 appraisal and help-seeking intervals.  
47  
48  
49  
50  
51

52 We went on to examine our themes by comparing narratives from participants diagnosed  
53 with thinner and thicker melanomas, and by the melanoma types within these groups. We  
54 further validated our themes by examining the whole dataset stratified by gender, by age  
55 (less than 60 vs 60 and over, and 80 and over), by educational level (no further education vs  
56 further education), and by geographical location (Cambridge vs Edinburgh). Credibility was  
57  
58  
59  
60

1  
2  
3 increased by the two researchers together undertaking coding and producing code tables  
4 throughout the analytic process, and reaching consensus from the potentially wide range of  
5 interpretations across the 'core' analysis team.  
6  
7  
8  
9

## 10 RESULTS

11 A total of 241 adult patients were approached to take part in this study (Cambridge 114,  
12 Edinburgh 127), 121 were willing to participate (50%: Cambridge 53%, Edinburgh 47%), and  
13 63 were interviewed.  
14  
15  
16

### 17 Patient characteristics

18 Table 1 shows the demographic and self-reported skin characteristics of the 63 study  
19 participants, and the clinical characteristics of their melanomas, comparing participants with  
20 thinner (n=33, **median Breslow thickness 0.5 mm, range 0.1-0.9 mm**) and thicker (n=30,  
21 **median Breslow thickness 3.5 mm, range 2.1-12.0 mm**) melanomas. **While people with**  
22 **thinner melanomas were younger (60.5 vs 66.1 years), the groups were otherwise similar**  
23 **for socio-demographic factors.** One quarter of the group reported a family history of  
24 melanoma, while eight participants reported previous skin cancer (melanoma 2, basal cell  
25 carcinoma (BCC) 6): we were only able to verify the two melanomas with histology reports.  
26 The thinner melanomas were all histologically reported as superficial spreading melanomas  
27 (SSM) and lentigo maligna melanomas (LMM) apart from one diagnosed as part SSM and  
28 part NM ('other'). Due to our sampling strategy there was a higher prevalence of nodular  
29 melanomas than in reported local figures. However, only a third of the thicker melanomas  
30 were nodular melanomas (NM, n=10), while a third were SSM (n=10), and the remaining  
31 third had 'other' diagnoses (LMM 2, acral 1, malignant blue naevus 1, unclassified 6). Of the  
32 nine participants diagnosed with melanoma on their back, seven were male, and three had  
33 thicker melanomas (NM 2, SSM 1).  
34  
35  
36  
37  
38  
39  
40  
41  
42  
43  
44

### 45 Duration of skin changes

46 Four participants (male 3, female 1) had their melanomas diagnosed opportunistically by a  
47 HCP (3 GPs, 1 oncologist); all these were thinner melanomas. The time to presentation (TTP)  
48 was between 1 week and 303 weeks (thinner: median TTP 21 weeks, range 1-303 weeks, **5**  
49 **longer than 52 weeks**; thicker: median TTP 19 weeks, range 1-156 weeks, **7 longer than 52**  
50 **weeks**). Most participants who presented with skin changes were referred after their first  
51 primary care consultation. The remainder were referred after their second consultation  
52 (n=11); none reported more than two consultations prior to referral. Comparisons between  
53 those with thinner (n=4) and thicker (n=7) melanomas who were referred after a second  
54  
55  
56  
57  
58  
59  
60

1  
2  
3 primary care consultation are presented in Table 5 and discussed later (see section on  
4 Healthcare providers and system factors).

5  
6 The main emerging themes within the appraisal and help-seeking intervals are discussed  
7 below. Throughout this section quotations are accompanied by information about gender  
8 (M, F), age, melanoma group (thinner or thicker), type of melanoma (SSM, NM, LMM,  
9 other), and symptom duration as time to presentation in weeks (including first and second  
10 presentations).

## 11 12 13 14 15 **The appraisal interval**

16  
17 The 59 participants who detected their melanoma themselves described a variable and  
18 complex process of appraisal and re-appraisal of their skin, against their background  
19 knowledge of 'normal skin changes' and potential risk factors. We found no evidence of  
20 differences between people with thinner and thicker melanomas across any of these  
21 themes.  
22  
23

### 24 25 **Patient factors**

#### 26 27 ***Explanations for skin changes***

28  
29 Awareness of a skin change, either a new lesion or a change in an existing lesion, did not  
30 usually cause any initial concern as it seemed so innocuous, and was often attributed to  
31 normal life changes such as pregnancy or aging.  
32  
33

34  
35 *'I didn't recognise it as something that was different, because I've got quite a few moles on*  
36 *my skin so therefore I thought, "Has this been here before, or am I just imagining that I*  
37 *haven't seen it before?"' [F, 68, thinner, SSM, 52w]*

38  
39 *'Perhaps because I'd been pregnant and everything was darker anyway or you know, I didn't*  
40 *take any notice.'* [F, 36, thicker, NM, 17w]

41  
42 Other explanations were also often made, such as an insect bite or injury when the  
43 participant had been outside or in the garden.  
44

45  
46 *'Since I'd been outside to a barbeque and I thought, oh well I've been bitten, it's just bitten*  
47 *there on the mole.'* [F, 54, thicker, SSM, 1w]

48  
49 Skin changes were sometimes attributed to another skin condition (such as psoriasis) if it  
50 presented in a similar way; in these cases participants' previous experiences of a benign  
51 condition could influence their perception of the potential seriousness of the new skin  
52 changes.  
53  
54

#### 55 56 ***Prior beliefs about melanoma and its risk factors***

57  
58  
59  
60

1  
2  
3 Skin changes were appraised within the context of peoples' prior beliefs about melanoma  
4 and its risk factors, and their life experiences. Participants often used the terms skin cancer  
5 and melanoma interchangeably, and their prior awareness of melanoma varied widely.  
6  
7 Whereas some participants noted that they had no awareness at all, others described  
8 gaining some knowledge about melanoma via TV programmes, magazines, the internet, and  
9 occasionally, health promotion material. A minority had heightened awareness through the  
10 melanoma experience of a family member or friend, or even a celebrity. A family history of  
11 melanoma or a personal previous melanoma led several people to have heightened risk  
12 perception and awareness and to quickly identify skin changes as a potential melanoma; all  
13 these people sought help rapidly and presented with thinner melanomas:  
14  
15

16  
17 *'I wouldn't have known what they were talking about' [M, 62, thicker, SSM, 52w]*

18  
19 *'...because my mum has had a melanoma ten years ago so I've always been aware to keep a*  
20 *check on my moles.'* [F, 29, thinner, SSM, 3w]  
21

22 Many participants showed some understanding of the risk factors associated with  
23 melanoma and/or skin cancer when they discussed having lived in hot climates, or having  
24 suffered from sunburn, especially as a child. However, some were quite certain that they  
25 had never exposed themselves to the risk of UV damage:  
26

27  
28 *'I thought I had been careful about sitting out in the sun.'* [F, 57, thicker, NM, 36w]  
29

30 Prior knowledge or experience of melanoma and its risk factors did not appear to be related  
31 to educational levels, nor to melanoma thickness at diagnosis.  
32

### 33 34 ***Do skin changes 'match' a melanoma?*** 35

36 While some participants admitted to prior knowledge of the symptoms and signs of a  
37 melanoma, such as 'jagged edges' or change in colour, only a few people had known that an  
38 itchy or bleeding mole was a 'bad' sign. Only two people noticed a match between their  
39 observed skin changes and their mental image of a melanoma, and this match appeared to  
40 prompt appropriate help-seeking, leading to shorter times to presentation.  
41

42  
43 *'I don't know when I learnt it, but it was just in my subconscious that "ooh I need to go and,*  
44 *it's an itchy mole, that's not good".'* [M, 45, thicker, SSM, 4w/52w]  
45

46 Strikingly, the majority of participants reported that their observed skin changes did not  
47 match their mental image (which had arisen from the melanoma experience of a family  
48 member or friend, from written and visual images, or from their knowledge of other  
49 cancers, see Table 2). When the changes did not match their mental images, people  
50 appeared more likely to 'normalise' their skin changes, or adopt other explanations, thus  
51 delaying help-seeking and diagnosis. Thus, the appraisal interval was often prolonged when  
52 there was a 'mismatch' between the mental image people had of melanoma and the way in  
53 which their own skin changes developed.  
54  
55  
56  
57  
58  
59  
60

### Disease factors: skin changes

Most participants used rich and vivid lay vocabularies to describe their skin changes, for example, *'like a black fly squashed on a mirror'* [M, 48, thinner, SSM, 2w]. Table 3 shows descriptions of skin changes noticed by participants, displayed according to the items of the Glasgow seven-point checklist (7PCL) [25]. It also gives descriptions not commonly found on checklists. For instance, many people reported surprise at the small size of their melanoma, describing it as 'just a little spot'. Some also reported a 'spot on a mole', or that their skin change had been 'always there' or a 'new lesion'; a few reported their lesion as 'different to the others' (resonating with the Ugly Duckling sign [26]).

Overall, Table 3 shows that both thinner and thicker melanomas can show any of the changes described in the 7PCL. However there is a suggestion of slightly different patterns. In particular, patients with thicker melanomas, both NMs and SSMs, described the so-called 'minor features' of bleeding, oozing and itch more often. They also described both horizontal and vertical growth, again, irrespective of pathological type. Patients with thinner lesions discussed changes in shape more often. We were not able to find any differences in descriptions of skin changes between gender, age, educational level or geographical region.

### The help-seeking interval

Reasons for waiting before seeking help included weighing up the priority of their skin change against other commitments. Many participants had been encouraged by other people to seek the advice of a HCP for their skin change. Emotions such as fear of a serious condition, cancer or treatment, were seldom mentioned and seemed to play little part in most peoples' decision-making, either to promote or delay help-seeking. More were concerned about going to see their GP with only minor symptoms, and wasting the GP's time.

### Patient factors

#### *Prioritisation choices*

Many participants discussed other responsibilities in their lives which felt more important than making an appointment to consult their GP about a skin change, and therefore contributed to delays in help-seeking. These competing priorities included employment, care of family members, moving house, holidays, and other health concerns.

*'In the cab game you can't organise things, you can't afford to be off your work'* [M, 66, thicker, other, 156w]

*'The six year old has got ADHD and mild autism and he's hard work, and I suppose [you're] concentrating on him most of your life like, and don't think about yourself...'* [M, 36, thicker, NM, 78w/3w]



1  
2  
3 *'I'd been very busy with selling a house, buying a house, all the rest of it, and of course I've*  
4 *patients as well to see' [F, 72, thinner, SSM, 8w]*

5  
6 *'I had an ulcer on my leg, and redressing that, so I think I was more taken up with that*  
7 *getting healed...' [F, 76, thicker, NM, 4w (Community nurse contacted GP)]*

8  
9 Some people mentioned repeatedly failing to make an appointment with a HCP either  
10 because of the competing responsibilities or because a skin change was 'not a priority':

11 *'I was supposed to have phoned up, but I forgot because it was busy at work and... it just*  
12 *skipped my memory' [M, 59, thinner, SSM, 1w]*

13  
14 *'I didn't class it as an emergency...I didn't think it was important enough...' [M, 64, thicker,*  
15 *other, 20w]*

16  
17  
18 We found no differences in prioritisation choices between people with thinner and thicker  
19 melanomas.

### 20 21 22 23 ***Influence of other family members and the social network***

24  
25 Many participants had been encouraged by other people to seek medical help, either by an  
26 observation about the skin change itself, or an encouragement to make an appointment  
27 with their GP, see Table 4. Some participants had not been aware of their skin change until  
28 it was noticed by another person; others had known, and were also often aware that it was  
29 continuing to change, but they were ultimately encouraged to seek help by others. The  
30 other people included family members, friends, work colleagues, and people providing  
31 treatments such as beauty therapists and hairdressers. The promotion of help-seeking,  
32 whether by family members or friends, did not appear to affect time to presentation overall,  
33 but may have acted as a trigger for many people. A few people were wrongly reassured by  
34 family members or friends that their skin change was not potentially serious. This appeared  
35 to delay timely help-seeking. There was no evident difference in the influence of family  
36 members between people diagnosed with thinner or thicker melanomas.

### 37 38 39 40 41 ***Triggers for help-seeking***

42  
43 The main difference between participants with thinner and thicker melanomas was  
44 apparent with the 'triggers' that people described as they moved from the appraisal to help-  
45 seeking interval, when they realised that they 'had a reason to discuss their skin change with  
46 a HCP' - see Figure 1. While most people from both groups consulted family or their wider  
47 social network for endorsement to seek help about aspects of skin changes (changing  
48 colour, texture and size), some people with thinner melanomas also reported a heightened  
49 awareness of cancer from family experiences or the non-medical media, or noticing their  
50 skin changes as 'different to normal', while participants with thicker melanomas appeared  
51 to depend on prompts such as the more 'red flag' symptom of oozing/bleeding:

52  
53  
54  
55  
56 *'It was a black mole and most of my moles are dark or light brown so it was a different*  
57 *colour' [F, 29, thinner, SSM, 3w]*

1  
2  
3 *'I'd seen something on that Embarrassing Bodies programme, and they did a thing about*  
4 *moles and what was not right and so I suppose I saw that and that sort of made me think,*  
5 *maybe I should go and get it looked at.'* [F, 54, thicker, SSM, 1w]  
6

7 *'It started to bleed, that was the point at which I went to the doctor 'cos I thought it*  
8 *shouldn't be bleeding'* [F, 64, thicker, LMM, 104w]  
9

## 10 11 12 **Healthcare providers and system factors**

13  
14 Issues concerning healthcare providers and the NHS were only mentioned by a minority of  
15 participants. The first and most important area of concern involved a group of participants  
16 (n=11; thinner=4 (SSM 3, LMM 1); thicker=7 (SSM 2, NM 3, acral 1, blue malignant naevus 1)  
17 who reported that they had previously shown their lesion to a HCP, and had been reassured  
18 that they did not need further treatment, see Table 5. While some just made a passing  
19 reference to their first, reassuring encounter with their GP, others gave far more detailed  
20 descriptions. A first encounter often appeared to delay a second visit to the GP by providing  
21 'false reassurance' about the lesion. Some mentioned that they had not been given advice  
22 (oral, written or a website) on how to best monitor their lesion and what changes should  
23 alert them to returning to their GP; this could potentially result in thicker lesions at  
24 diagnosis.  
25  
26  
27  
28

29 *'When people have told you that it's okay... I sort of took me eye off the ball really because I*  
30 *thought, well, they know better than I do.'* [M, 75, thicker, SSM, 1w/17 w]  
31

32 Some people had problems with accessing their general practice for an appointment, and,  
33 for a few busy people, this problem was exacerbated by having competing priorities.  
34

35 *'Trying to get an appointment with the GP here can just be horrific and because I'm out on*  
36 *the road.. I have to plan these things a couple of weeks ahead.'* [F, 40, thinner, SSM, 3w]  
37

38 A few people with thicker melanomas also mentioned a dislike of seeing doctors, either in  
39 general practices or hospitals, so this might have delayed help-seeking.  
40

41 *'I'm just not a hospital person or a doctor person. If I'm really ill, I ken I'll have to go, but I*  
42 *have to be that way.'* [M, 52, thicker, SSM, 42w]  
43

44 Patients' concerns about 'wasting their GP's time' are well known, but this concern  
45 appeared to be exacerbated by the small size of the skin changes, and the lack of pain or  
46 other features which could signify more serious conditions. Again, this concern appeared  
47 more prevalent among people with thicker than thinner melanomas.  
48  
49

50 *'My decisions on going to the GP are always influenced to some extent by a knowledge of*  
51 *how busy they are and not wanting to waste their time.'* [F, 48, thicker, other, 4w/78w]  
52

53 *'I think most people that I know would be afraid of the doctor saying to himself or herself,*  
54 *you know, there's people just coming for nothing at all.'* [M, 93, thicker, LMM, 22w]  
55

56 A 56 year old woman diagnosed with a stage IIIA nodular melanoma on her lower leg  
57 described her pathway over six months as follows:  
58  
59  
60

1  
2  
3 Appraisal (10w): *'I've always had a mole on my leg.. it was there from birth.. it never*  
4 *bothered me because it was just flat and dark brown... It was possibly about six months ago I*  
5 *noticed it was just a little bit raised when it had always been flat.. as if like maybe something*  
6 *was stuck in there..'*

7  
8 Help-seeking: *'I was due to have a smear and.. I asked the nurse to look at it.. and she said,*  
9 *"Oh no, there's nothing to worry about, that's... I can tell these things," so she just sort of put*  
10 *my mind at rest... I thought, "Well, she knows what she's talking about."*

11  
12 Re-appraisal- 16 weeks: *'It just started obviously getting bigger and bigger. What was the*  
13 *worst was every time I knocked it, it bled.. like a tick on you, because it was big and bulbous.'*

14  
15 Help-seeking: *'I realised it was getting bigger and my friend and I had talked about it and [I*  
16 *returned to the surgery] .. it was a different nurse more senior, I have known her for years..*  
17 *she sort of panicked me ..saying.. I need to get that looked at straight away.'*  
18  
19  
20  
21  
22  
23

## 24 DISCUSSION

### 25 Main findings

26  
27 This is the first study of detailed patient descriptions of their symptom experience and  
28 pathways to diagnosis of thinner and thicker melanomas in the UK. Addressing the policy  
29 agenda to diagnose melanoma earlier, the findings provide a number of novel insights  
30 **suggesting** where future interventions may be targeted. The key finding is that there appear  
31 to be subtly different patterns of symptoms experienced by those with thicker and thinner  
32 melanomas. In particular, descriptions of vertical growth, bleeding, oozing and itch were  
33 features of thicker melanomas irrespective of pathological type. Furthermore, they did not  
34 appear to occur subsequent to changes in size, shape and colour, nor just be due to location  
35 on the body, for example, not all thicker lesions were nodular melanomas on the backs of  
36 older men. There was no clear distinction between time to presentation and melanoma  
37 thickness. It also does not appear that those with thicker melanomas have different  
38 cognitive, emotional or behavioural responses to skin changes compared to those with  
39 thinner melanomas, or have different pathways to or through the healthcare system. Whilst  
40 help-seeking was often postponed because of other life concerns, most decisions to seek  
41 help were triggered by common factors such as advice from family and friends.  
42  
43  
44  
45  
46  
47

48 We also found a mismatch between the textual information and published images currently  
49 available, and the skin changes that were noticed **by our participants**. This provides  
50 opportunities to incorporate more appropriate lay vocabulary and photographic images into  
51 targeted community NHS and charity-run awareness campaigns such as 'Be Clear on Cancer'  
52 and 'Detect Cancer Early' [27]. A small but important minority of participants did not have  
53 their developing melanomas recognised during their first primary care consultation, and  
54 were not provided with enough information about on-going assessment of further skin  
55  
56  
57  
58  
59  
60

1  
2  
3 changes or when to return to their clinician. These 'safety-netting' opportunities could be  
4 improved by more systematic approaches by GPs.  
5  
6  
7

### 8 **Strengths and weaknesses**

9  
10 Our methodological approaches have a number of strengths. We do not know of any other  
11 studies worldwide which have compared the patient experience across the appraisal and  
12 help-seeking intervals between people with thinner and thicker melanomas. We recruited  
13 participants systematically from dermatology clinics in two contrasting regions over 12  
14 months, and interviewed all the consenting patients diagnosed with the much less common  
15 melanomas  $\geq 2\text{mm}$  thickness with a poorer prognosis. The thicker melanoma group included  
16 equal numbers of NMs, SSMs, and other rare and unclassified types although no amelanotic  
17 lesions; the diversity of types in this group suggest that the differences identified between  
18 the thinner and thicker groups cannot simply be considered due to the biological differences  
19 between SSMs and NMs. Furthermore, using semi-structured interviews soon after  
20 diagnosis reduced recall bias, and allowed participants to speak freely about the period  
21 leading up to their diagnosis.  
22  
23  
24  
25  
26

27 **We used novel and rigorous approaches to data collection, with the Model of Pathways to**  
28 **Treatment to underpin the interview schedule, and four different data collection methods**  
29 **including the use of patient drawings.** Asking people to draw their skin changes and  
30 developing melanomas was of value to a number of participants, allowing them to describe  
31 subtle changes in more detail, and also to corroborate the accuracy of their recall of timing  
32 and events. Calendar-landmarking was also of value to a large minority of participants, who  
33 were able to refine their recall of events and time intervals along their time to presentation  
34 [28]. Data saturation was reached before the total sample had been interviewed, suggesting  
35 that our findings are robust and representative of people diagnosed with melanoma in  
36 these regions of England and Scotland. As recommended in a 2006 review of symptom  
37 interpretation as a source of delay in melanoma presentation [29], we increased the rigour  
38 of our research by applying a theoretical approach (the Pathways to Treatment model,  
39 [17,18]) to frame our data collection and analysis. We conducted and reported this study  
40 according to the Aarhus statement guidelines on early cancer diagnosis research [23].  
41  
42  
43  
44  
45

46 The main weakness is that the interviews are necessarily retrospective and subject to recall  
47 and framing bias. As a result, the accounts cannot be regarded as an exact description of  
48 what happened. Instead, they are narratives that allowed people to describe their  
49 experiences and reflect a post-hoc rationalisation of events framed by their subsequent  
50 encounters with HCPs and increased knowledge since the diagnosis. **Although we recruited**  
51 **all patients with thicker melanomas compared with purposive recruitment for thinner**  
52 **melanomas we believe the groups were similar as the latter group were matched for**  
53 **gender, age, geographic location and season.** Furthermore, people from these two UK  
54 regions may have different beliefs and experiences of the pathway to melanoma diagnosis  
55  
56  
57  
58  
59  
60

1  
2  
3 from people in other UK regions, and patients who did not agree to take part in the study  
4 **may have affected the representativeness of the sample.**  
5  
6  
7

### 8 **Comparison with existing literature**

9  
10 While there is a paucity of qualitative studies undertaken with people soon after their  
11 melanoma diagnosis, our findings resonate with a grounded theory study undertaken in  
12 northern England that explored the meaning to people treated for melanoma of shorter and  
13 longer time-lapses between detecting signs and receiving treatment [30], and those from an  
14 interview study about factors influencing presentation in primary care, undertaken with  
15 patients with suspicious pigmented lesions (only 4/40 interviewees were later diagnosed  
16 with melanoma) [15]. A French questionnaire study set among 590 people with melanomas  
17 also showed that relatives were involved in the detection of half of the melanomas, with  
18 median delays of 4 months before the patient realized they had a suspicious lesion, and  
19 further median delays of 2 months before this lesion was seen by a doctor [31]. Other  
20 evidence around time to diagnosis, but not comparing thinner and thicker melanomas,  
21 comes mainly from retrospective review of medical records or dermatologist experience,  
22 and suggests similar times to presentation and diagnosis [32].  
23  
24  
25  
26  
27  
28  
29

### 30 **Implications for clinicians and policymakers**

31  
32 Policymakers continue to face the challenge of a widespread lack of awareness of cancer  
33 symptoms among the UK general population [33], and that there are significant barriers to  
34 help-seeking [34]. Policy responses have included campaigns to raise symptom awareness,  
35 with major investment in the new 'Be Clear on Cancer' melanoma campaign. Our findings  
36 clearly demonstrate that the words and images in current use may not meet the needs of  
37 the population who are likely to be assessing their skin changes at an early stage in tumour  
38 development. Current images tend to represent more extreme changes which may not  
39 always be present. Future melanoma awareness campaigns, as well as NHS and charity  
40 websites giving information about skin checks, would be advised to provide more evidence  
41 around the features of early skin changes using lay vocabulary [35], to consider their  
42 selection of images of early melanomas for a better 'match' with people's observations, and  
43 to provide more evidence around prompts to encourage timely help-seeking. They should  
44 also consider more targeted approaches such as focusing on: higher risk groups such as  
45 older men, with tailored information, lay vocabulary and images; families and friends with  
46 advice on how to check each other's skin regularly; and professional groups from the hair,  
47 beauty, and exercise industries who also undertake informal skin checks.  
48  
49  
50  
51  
52  
53

54 Several participants reported visiting their GP or other HCP on more than one occasion and  
55 some were given false reassurance. The average GP working in the UK will only diagnose a  
56 melanoma every 2-3 years but will commonly be consulted about a pigmented skin lesion,  
57 often after other health issues have already been discussed in the consultation. While we  
58  
59  
60

1  
2  
3 recognise the challenges facing GPs when differentiating potentially rare and serious  
4 conditions such as melanoma from common and benign conditions, this study suggests that  
5 some patients are not being provided with adequate information either about monitoring  
6 their skin changes or what changes should prompt another consultation. The principles of  
7 'safety-netting' have been disseminated by the RCGP and could be applied more effectively;  
8 they include recommendations for appropriate advice and written information for patients  
9 about the warning symptoms, monitoring symptoms, when to make a follow-up  
10 appointment, and reassurance to patients that symptoms like skin changes warrant GP  
11 attention, thus 'legitimising' a follow-up visit [36].  
12  
13  
14  
15  
16

### 17 **Unanswered questions and future research**

18  
19 While the findings of this qualitative study are of immediate importance to primary care  
20 clinicians and policymakers, there are also suggestions of subtly different patterns of  
21 symptoms experienced by those with thicker and thinner melanomas, irrespective of  
22 pathological type. The descriptions of vertical as well as horizontal growth, and bleeding,  
23 oozing or itch were particular features of thicker melanomas but not only NMs.  
24 Furthermore, they did not appear to occur subsequent to changes in size, shape or colour so  
25 may not necessarily be later features of melanoma. Although these symptom clusters may  
26 be more related to tumour biology than differences in symptom appraisal and help-seeking,  
27 these interesting differences need further exploration with bigger and more diverse  
28 populations and quantitative as well as qualitative study designs.  
29  
30  
31  
32

33 Alternative approaches to raising symptom awareness and supporting monitoring of skin  
34 changes to prompt earlier help seeking may be needed. There is a growing interest in the  
35 application of smartphone technology as one such approach but concerns remain around  
36 their safety and utility, and is clearly an area for further research [37].  
37  
38  
39  
40  
41  
42  
43  
44  
45  
46  
47  
48  
49  
50  
51  
52  
53  
54  
55  
56  
57  
58  
59  
60

## ACKNOWLEDGEMENTS

We particularly thank all the patients who kindly gave up their time and shared their personal accounts with us. We also thank Vicky McMorrnan and Sheena Dryden, melanoma/skin cancer nurse specialists at Cambridge University Hospitals NHS Foundation Trust and the Edinburgh Royal Infirmary NHS Lothian respectively, for their enthusiastic help with recruitment. We are also grateful to our two patients who gave us insights and feedback throughout the study, to Anna Barford for her early contribution to study set-up and data collection, to James Brimicombe for advice on data management and for developing the research database, and to Mr Per Hall for his support and encouragement throughout the study and comments on the final manuscript.

## Contributors

This study arose from collaboration between members of the National Cancer Research Institute (NCRI) Primary Care and Melanoma Clinical Studies Groups. FW, CC, RM, SS and DW were involved in the design of the study. LB and DC performed all the interviews and led the analysis, contributing to the core study team together with FW, SS and CC. FW wrote the first draft of the manuscript; all authors reviewed and edited the manuscript.

## Funding

Thanks to our funding organisation the National Awareness and Early Diagnosis Initiative (NAEDI), and to their funding partners: Cancer Research UK; Department of Health, England; Economic and Social Research Council; Health and Social Care Research and Development Division; Public Health Agency, Northern Ireland, National Institute for Social Care and Health Research, Wales and the Scottish Government. All researchers were independent of the funding body and the study sponsors and funder had no role in study design; data collection, analysis and interpretation of data; in the writing of the report; or decision to submit the article for publication.

FW was supported by an NIHR Clinical Lectureship followed by a NIHR Clinician Scientist award at the time of this study. The views expressed in this publication are those of the author(s) and not necessarily those of the NHS, the National Institute for Health Research or the Department of Health.

## Ethics and governance approvals

The study obtained ethical approval from the Cambridgeshire 4 Research Ethics Committee (11/EE/0076). Patients gave informed written consent for participation. The study was CKCRN approved (ID number 10310), and obtained NHS governance approvals from Cambridge University Hospitals NHS Foundation Trust's Research & Development Department, and NHS Lothian (Lothian R&D Project No: 2011/R/DER/04).

## Data sharing

No additional data available

### Competing Interests

All authors have completed the Unified Competing Interest form at [www.icmje.org/coi\\_disclosure.pdf](http://www.icmje.org/coi_disclosure.pdf) (available on request from the corresponding author) and declare that (1) they have no support from or relationships with companies that might have an interest in the submitted work in the previous 3 years; (2) their spouses, partners, or children have no financial relationships that may be relevant to the submitted work; and (3) they have no non-financial interests that may be relevant to the submitted work.

The corresponding author has the right to grant on behalf of all authors and does grant on behalf of all authors, an exclusive licence on a worldwide basis to the BMJ Publishing Group Ltd and its Licensees to permit this article (if accepted) to be published in BMJ editions and any other BMJ PGL products and sublicences to exploit all subsidiary rights, as set out in our licence (<http://resources.bmj.com/bmj/authors/checklists-forms/licence-for-publication>).

All authors had full access to all of the data in the study and can take responsibility for the integrity of the data and the accuracy of the data analysis

The corresponding author affirms that the manuscript is an honest, accurate, and transparent account of the study being reported; that no important aspects of the study have been omitted; and that any discrepancies from the study as planned (and, if relevant, registered) have been explained.



## REFERENCES

1. Abdel-Rahman M, Stockton D, Rachet B, et al. What if cancer survival in Britain were the same as in Europe: how many deaths are avoidable? *Br J Cancer* 2009;**101 Suppl 2**:S115-24 doi: 10.1038/sj.bjc.6605401.
2. Cancer Research UK.  
<http://www.cancerresearchuk.org/cancerinfo/cancerstats/types/skin/survival/#stage> (last accessed 8 June 2014).
3. de Vries E, Coebergh JW. Cutaneous malignant melanoma in Europe. *Eur J Cancer* 2004;**40**(16): 2355-66.
4. Berrino F, De Angelis R, Sant M, et al. Survival for eight major cancers and all cancers combined for European adults diagnosed in 1995-99: results of the EUROCARE-4 study. *Lancet Oncol* 2007;**8**(9):773-83.
5. Jemal A, Devesa SS, Hartge P, et al. Recent trends in cutaneous melanoma incidence among whites in the United States. *J Natl Cancer Inst* 2001;**93**(9):678-83.
6. Garbe C, Leiter U. Melanoma epidemiology and trends. *Clin Dermatol* 2009;**27**(1):3-9.
7. Balch CM, Gershenwald JE, Soong SJ, et al. Final version of 2009 AJCC melanoma staging and classification. *J Clin Oncol* 2009;**27**(36):6199-206 doi: 10.1200/JCO.2009.23.4799.
8. Farasat S, Yu SS, Neel VA, et al. A new American Joint Committee on Cancer staging system for cutaneous squamous cell carcinoma: creation and rationale for inclusion of tumor (T) characteristics. *J Am Acad Dermatol* 2011;**64**(6):1051-9 doi: 10.1016/j.jaad.2010.08.033.
9. Martorell-Calatayud A, Nagore E, Botella-Estrada R, et al. Defining fast-growing melanomas: reappraisal of epidemiological, clinical, and histological features. *Melanoma Res* 2011;**21**(2):131-8 doi: 10.1097/CMR.0b013e328342f312.
10. Lyratzopoulos G, Abel GA, McPhail S, et al. Measures of promptness of cancer diagnosis in primary care: secondary analysis of national audit data on patients with 18 common and rarer cancers. *Br J Cancer* 2013;**108**(3):686-90 doi: 10.1038/bjc.2013.1.
11. Baughan P, O'Neill B, Fletcher E. Auditing the diagnosis of cancer in primary care: the experience in Scotland. *Br J Cancer* 2009;**101 Suppl 2**:S87-91 doi: 10.1038/sj.bjc.6605397.
12. Keeble S, Abel GA, Saunders CL, et al. Variation in promptness of presentation among 10,297 patients subsequently diagnosed with one of 18 cancers: Evidence from a national audit of cancer diagnosis in primary care. *Int J Cancer* 2014 doi: 10.1002/ijc.28763.
13. Austoker J, Bankhead C, Forbes LJ, et al. Interventions to promote cancer awareness and early presentation: systematic review. *Br J Cancer* 2009;**101 Suppl 2**:S31-9 doi: 10.1038/sj.bjc.6605388.

- 1  
2  
3 14. Branstrom R, Hedblad MA, Krakau I, et al. Reasons to seek medical attention for a skin check-up:  
4 the layman's perspective. *Eur J Public Health* 2003;**13**(4):294-8.  
5
- 6  
7 15. Walter FM, Humphrys E, Tso S, et al. Patient understanding of moles and skin cancer, and factors  
8 influencing presentation in primary care: a qualitative study. *BMC Fam Pract* 2010;**11**:62 doi:  
9 10.1186/1471-2296-11-62.  
10
- 11  
12 16. Emery JD, Walter FM, Gray V, et al. Diagnosing cancer in the bush: a mixed-methods study of  
13 symptom appraisal and help-seeking behaviour in people with cancer from rural Western  
14 Australia. *Fam Pract* 2013;**30**(3):294-301 doi: 10.1093/fampra/cms087.  
15
- 16  
17 17. Walter FM, Webster A, Scott S, et al. The Andersen Model of Total Patient Delay: a systematic  
18 review of its application in cancer diagnosis. *J Health Serv Res Policy* 2012;**17**(2):110-8 doi:  
19 10.1258/jhsrp.2011.010113.  
20
- 21  
22 18. Scott SE, Walter FM, Webster A, et al. The model of pathways to treatment: conceptualization  
23 and integration with existing theory. *Br J Health Psychol* 2013;**18**(1):45-65 doi:  
24 10.1111/j.2044-8287.2012.02077.x.  
25
- 26  
27 19. Glasner T, van der Vaart W. Applications of calendar instruments in social surveys: a review. *Qual*  
28 *Quant* 2009;**43**(3):333-49 doi: 10.1007/s11135-007-9129-8.  
29
- 30  
31 20. Scott SE, Birt L, Carvers D, et al. Patient's drawings of their melanoma: A novel approach to  
32 understanding patients' symptom perception prior to healthcare consultation. In  
33 submission.  
34
- 35  
36 21. Fitzpatrick TB, Sober AJ. Sunlight and skin cancer. *N Engl J Med* 1985;**313**(13):818-20 doi:  
37 10.1056/NEJM198509263131310.  
38
- 39  
40 22. Gale NK, Heath G, Cameron E, et al. Using the framework method for the analysis of qualitative  
41 data in multi-disciplinary health research. *BMC Med Res Methodol* 2013;**13**:117 doi:  
42 10.1186/1471-2288-13-117.  
43
- 44  
45 23. Weller D, Vedsted P, Rubin G, et al. The Aarhus statement: improving design and reporting of  
46 studies on early cancer diagnosis. *Br J Cancer* 2012;**106**(7):1262-7 doi: 10.1038/bjc.2012.68.  
47
- 48  
49 24. Hansen RP, Vedsted P, Sokolowski I, et al. Time intervals from first symptom to treatment of  
50 cancer: a cohort study of 2,212 newly diagnosed cancer patients. *BMC Health Serv Res*  
51 2011;**11**:284 doi: 10.1186/1472-6963-11-284.  
52
- 53  
54 25. Mackie RM, Doherty VR. Seven-point checklist for melanoma. *Clin Exp Dermatol* 1991;**16**(2):151-3.  
55
- 56  
57 26. Grob JJ, Bonerandi JJ. The 'ugly duckling' sign: identification of the common characteristics of  
58 naevi in an individual as a basis for melanoma screening. *Arch Dermatol* 1998;**134**(1):103-  
59 104.  
60

- 1  
2  
3 27. Cancer research UK. About Be Clear on Cancer 2013. Available from:  
4 [http://www.cancerresearchuk.org/cancerinfo/spotcancerearly/naedi/beclearoncancer/back](http://www.cancerresearchuk.org/cancerinfo/spotcancerearly/naedi/beclearoncancer/background)  
5 [ground](http://www.cancerresearchuk.org/cancerinfo/spotcancerearly/naedi/beclearoncancer/background) (accessed 8 June 2014).  
6  
7  
8 28. Mills K, Cheung C, Hall N, et al. Using calendar landmarking instruments may aid patient recall of  
9 cancer symptom time intervals from onset to diagnosis. In submission.  
10  
11 29. Nyawata I, Topping A. Symptom interpretation as a source of delay in malignant melanoma  
12 presentation - A literature review. *Clinical Effectiveness in Nursing* 2006;**9**:e68-e78.  
13  
14 30. Topping A, Nkosana-Nyawata I, Heyman B. 'I am not someone who gets skin cancer': risk, time  
15 and malignant melanoma. *Health, Risk and Society* 2013;**15**(6-7):596-614.  
16  
17 31. Richard MA, Grob JJ, Avril MF, et al. Delays in diagnosis and melanoma prognosis (I): the role of  
18 patients. *Int J Cancer* 2000;**89**(3):271-79.  
19  
20 32. Baade PD, English DR, Youl PH, et al. The relationship between melanoma thickness and time to  
21 diagnosis in a large population-based study. *Arch Dermatol* 2006;**142**(11):1422-27.  
22  
23 33. Simon AE, Waller J, Robb K, et al. Patient delay in presentation of possible cancer symptoms: the  
24 contribution of knowledge and attitudes in a population sample from the United Kingdom.  
25 *Cancer Epidemiol Biomarkers Prev* 2010;**19**(9):2272-7 doi: 10.1158/1055-9965.EPI-10-0219.  
26  
27 34. Forbes LJ, Simon AE, Warburton F, et al. Differences in cancer awareness and beliefs between  
28 Australia, Canada, Denmark, Norway, Sweden and the UK: do they contribute to differences  
29 in cancer survival? *Br J Cancer* 2013;**108**(2):292-300 doi: 10.1038/bjc.2012.542.  
30  
31 35. Aldridge RB, Zanotto M, Ballerini L, et al. Novice identification of melanoma: not quite as  
32 straightforward as the ABCDs. *Acta Dermato-Venereologica* 2011;**91**(2):125-30 doi:  
33 10.2340/00015555-1070.  
34  
35 36. Mitchell E, Rubin G, Macleod U. Improving diagnosis of cancer- a toolkit for General Practice,  
36 Royal College of General Practitioners, 2012.  
37  
38 37. Tyagi A, Miller K, Cockburn M. e-Health Tools for Targeting and Improving Melanoma Screening:  
39 A Review. *Journal of Skin Cancer* 2012;**2012**:437502 doi: 10.1155/2012/437502.  
40  
41 38. Mackie R. *Malignant Melanoma. A Guide to Early Diagnosis*: Glasgow University Department of  
42 Dermatology, 1989.  
43  
44  
45  
46  
47  
48  
49  
50  
51  
52  
53  
54  
55  
56  
57  
58  
59  
60

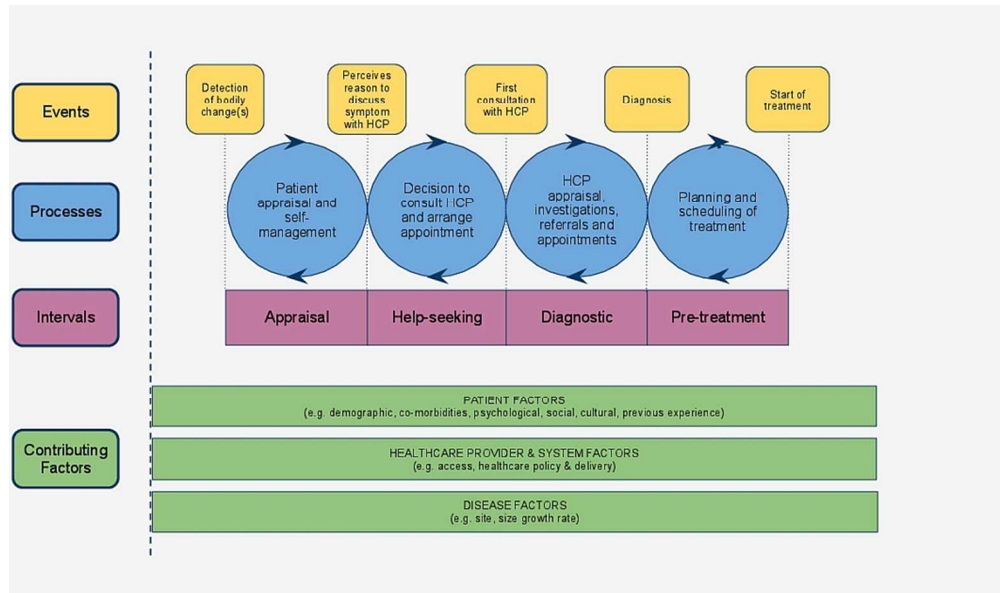

Figure 1 Model of Pathways to Treatment  
90x53mm (300 x 300 DPI)

review only

1  
2  
3  
4  
5  
6  
7  
8  
9  
10  
11  
12  
13  
14  
15  
16  
17  
18  
19  
20  
21  
22  
23  
24  
25  
26  
27  
28  
29  
30  
31  
32  
33  
34  
35  
36  
37  
38  
39  
40  
41  
42  
43  
44  
45  
46  
47  
48  
49  
50  
51  
52  
53  
54  
55  
56  
57  
58  
59  
60
